# Supplementary material for: PathLocdb: a comprehensive database for the subcellular localization of metabolic pathways and its application to multiple localization analysis
Source: PubMed Central journal article supplement (PMC3005916; doi:10.1186/1471-2164-11-s4-s13), 2010-12-02
Supplement: 1471-2164-11-S4-S13-S1.pdf [file 1471-2164-11-S4-S13-S1.pdf]

| PathLoc<br>superpathway ID | Superpathways with completely different locations between<br>organisms                                                     |
|----------------------------|----------------------------------------------------------------------------------------------------------------------------|
| <a href="#">PLSP10</a>     | Amine and polyamine biosynthesis ; betaine biosynthesis via choline pathway ; betaine from betaine aldehyde                |
| <a href="#">PLSP19</a>     | Amino-acid biosynthesis ; L-arginine biosynthesis ; L-arginine from L-ornithine and carbamoyl phosphate                    |
| <a href="#">PLSP21</a>     | Amino-acid biosynthesis ; L-arginine biosynthesis ; N(2)-acetyl-L-ornithine from L-glutamate                               |
| <a href="#">PLSP21</a>     | Amino-acid biosynthesis ; L-arginine biosynthesis ; N(2)-acetyl-L-ornithine from L-glutamate                               |
| <a href="#">PLSP22</a>     | Amino-acid biosynthesis ; L-arginine biosynthesis ; carbamoyl phosphate from HCO(3) (-)                                    |
| <a href="#">PLSP27</a>     | Amino-acid biosynthesis ; L-histidine biosynthesis ; L-histidine from 5-phospho-alpha-D-ribose 1-diphosphate               |
| <a href="#">PLSP27</a>     | Amino-acid biosynthesis ; L-histidine biosynthesis ; L-histidine from 5-phospho-alpha-D-ribose 1-diphosphate               |
| <a href="#">PLSP27</a>     | Amino-acid biosynthesis ; L-histidine biosynthesis ; L-histidine from 5-phospho-alpha-D-ribose 1-diphosphate               |
| <a href="#">PLSP29</a>     | Amino-acid biosynthesis ; L-isoleucine biosynthesis ; L-isoleucine from 2-oxobutanoate                                     |
| <a href="#">PLSP30</a>     | Amino-acid biosynthesis ; L-leucine biosynthesis ; L-leucine from 3-methyl-2-oxobutanoate                                  |
| <a href="#">PLSP30</a>     | Amino-acid biosynthesis ; L-leucine biosynthesis ; L-leucine from 3-methyl-2-oxobutanoate                                  |
| <a href="#">PLSP31</a>     | Amino-acid biosynthesis ; L-lysine biosynthesis via AAA pathway ; L-alpha-aminoadipate from 2-oxoglutarate                 |
| <a href="#">PLSP44</a>     | Amino-acid biosynthesis ; L-proline biosynthesis ; L-glutamate 5-semialdehyde from L-glutamate                             |
| <a href="#">PLSP45</a>     | Amino-acid biosynthesis ; L-proline biosynthesis ; L-glutamate 5-semialdehyde from L-ornithine                             |
| <a href="#">PLSP46</a>     | Amino-acid biosynthesis ; L-proline biosynthesis ; L-proline from L-glutamate 5-semialdehyde                               |
| <a href="#">PLSP51</a>     | Amino-acid biosynthesis ; L-valine biosynthesis ; L-valine from pyruvate                                                   |
| <a href="#">PLSP54</a>     | Amino-acid biosynthesis; L-methionine biosynthesis via de novo pathway                                                     |
| <a href="#">PLSP62</a>     | Amino-acid degradation ; L-lysine degradation via saccharopine pathway ; glutaryl-CoA from L-lysine                        |
| <a href="#">PLSP64</a>     | Amino-acid degradation ; L-proline degradation into L-glutamate ; L-glutamate from L-proline                               |
| <a href="#">PLSP67</a>     | Amino-acid degradation; 4-aminobutanoate degradation                                                                       |
| <a href="#">PLSP88</a>     | Carbohydrate degradation ; pentose phosphate pathway ; D-ribulose 5-phosphate from D-glucose 6-phosphate (oxidative stage) |
| <a href="#">PLSP92</a>     | Carbohydrate metabolism ; glyoxylate cycle ; L-malate from isocitrate                                                      |

[PLSP99](#) Carotenoid biosynthesis ; phytoene biosynthesis ; phytoene from geranylgeranyl-PP

[PLSP111](#) Cofactor biosynthesis ; FMN biosynthesis ; FMN from riboflavin (ATP route)

[PLSP129](#) Cofactor biosynthesis ; tetrahydrofolate biosynthesis ; 2-amino-4-hydroxy-6-hydroxymethyl-7,8-dihydropteridine diphosphate from 2-amino-4-hydroxy-6-(erythro-1,2,3-trihydroxypropyl)-dihydropteridine triphosphate

[PLSP129](#) Cofactor biosynthesis ; tetrahydrofolate biosynthesis ; 2-amino-4-hydroxy-6-hydroxymethyl-7,8-dihydropteridine diphosphate from 2-amino-4-hydroxy-6-(erythro-1,2,3-trihydroxypropyl)-dihydropteridine triphosphate

[PLSP131](#) Cofactor biosynthesis ; tetrahydrofolate biosynthesis ; dihydrofolate from 2-amino-4-hydroxy-6-hydroxymethyl-7,8-dihydropteridine diphosphate and 4-aminobenzoate

[PLSP149](#) Energy metabolism; sulfur metabolism

[PLSP156](#) Glycan biosynthesis; sucrose metabolism

[PLSP159](#) Glycan metabolism ; pectin degradation ; 2-dehydro-3-deoxy-D-gluconic acid from pectin

[PLSP176](#) Isoprenoid biosynthesis ; dimethylallyl-PP biosynthesis ; dimethylallyl-PP from isopentenyl-PP

[PLSP209](#) Metabolic intermediate biosynthesis ; chorismate biosynthesis ; chorismate from D-erythrose 4-phosphate and PEP

[PLSP209](#) Metabolic intermediate biosynthesis ; chorismate biosynthesis ; chorismate from D-erythrose 4-phosphate and PEP

[PLSP209](#) Metabolic intermediate biosynthesis ; chorismate biosynthesis ; chorismate from D-erythrose 4-phosphate and PEP

[PLSP209](#) Metabolic intermediate biosynthesis ; chorismate biosynthesis ; chorismate from D-erythrose 4-phosphate and PEP

[PLSP209](#) Metabolic intermediate biosynthesis ; chorismate biosynthesis ; chorismate from D-erythrose 4-phosphate and PEP

[PLSP210](#) Metabolic intermediate biosynthesis ; mevalonic acid biosynthesis ; (R)-mevalonic acid from acetyl-CoA

[PLSP235](#) Phospholipid metabolism ; phosphatidylethanolamine biosynthesis ; phosphatidylethanolamine from CDP-diacylglycerol

[PLSP254](#) Plant hormone degradation; abscisic acid degradation

[PLSP269](#) Porphyrin metabolism ; protoporphyrin-IX biosynthesis ; coproporphyrinogen III from 5-aminolevulinate

[PLSP271](#) Porphyrin metabolism ; protoporphyrin-IX biosynthesis ; protoporphyrinogen-IX from coproporphyrinogen III (O2 route)

[PLSP278](#) Protein modification ; protein lipoylation via endogenous pathway ; protein N(6)-(lipoyl)lysine from octanoyl-[acyl-carrier-protein]

[PLSP279](#) Protein modification ; protein lipoylation via exogenous pathway ; protein N(6)-(lipoyl)lysine from lipoic acid

[PLSP285](#) Protein modification; protein neddylation

[PLSP293](#) Purine metabolism ; IMP biosynthesis via de novo pathway ; 5-amino-1-(5-phospho-D-ribosyl)imidazole-4-carboxamide from N(2)-formyl-N(1)-(5-phospho-D-ribosyl)glycinamide

[PLSP296](#) Purine metabolism ; IMP biosynthesis via salvage pathway ; IMP from AMP

[PLSP301](#) Purine metabolism ; uric acid degradation ; (S)-allantoin from uric acid

[PLSP301](#) Purine metabolism ; uric acid degradation ; (S)-allantoin from uric acid

[PLSP303](#) Pyrimidine metabolism ; UMP biosynthesis via de novo pathway ; UMP from HCO(3)(-)

[PLSP303](#) Pyrimidine metabolism ; UMP biosynthesis via de novo pathway ; UMP from HCO(3)(-)

[PLSP303](#) Pyrimidine metabolism ; UMP biosynthesis via de novo pathway ; UMP from HCO(3)(-)

[PLSP304](#) Pyrimidine metabolism ; UMP biosynthesis via salvage pathway ; UMP from uracil

[PLSP318](#) Steroid biosynthesis ; zymosterol biosynthesis ; zymosterol from lanosterol

[PLSP318](#) Steroid biosynthesis ; zymosterol biosynthesis ; zymosterol from lanosterol

[PLSP326](#) Sulfur metabolism ; glutathione biosynthesis ; glutathione from L-cysteine and L-glutamate

[PLSP332](#) Terpene metabolism ; lanosterol biosynthesis ; lanosterol from farnesyl-PP
