# Supplementary material for: PathLocdb: a comprehensive database for the subcellular localization of metabolic pathways and its application to multiple localization analysis
Source: PubMed Central journal article supplement (PMC3005916; doi:10.1186/1471-2164-11-s4-s13), 2010-12-02
Supplement: 1471-2164-11-S4-S13-S2.pdf [file 1471-2164-11-S4-S13-S2.pdf]

| PathLoc<br>superpathway ID | Superpathways with partially different locations between<br>organisms                                         |
|----------------------------|---------------------------------------------------------------------------------------------------------------|
| <a href="#">PLSP1</a>      | Alcohol metabolism ; ethanol degradation ; acetate from ethanol                                               |
| <a href="#">PLSP10</a>     | Amine and polyamine biosynthesis ; betaine biosynthesis via choline pathway ; betaine from betaine aldehyde   |
| <a href="#">PLSP11</a>     | Amine and polyamine biosynthesis ; creatine biosynthesis ; creatine from L-arginine and glycine               |
| <a href="#">PLSP13</a>     | Amine and polyamine biosynthesis; carnitine biosynthesis                                                      |
| <a href="#">PLSP17</a>     | Amine and polyamine degradation; spermine degradation                                                         |
| <a href="#">PLSP19</a>     | Amino-acid biosynthesis ; L-arginine biosynthesis ; L-arginine from L-ornithine and carbamoyl phosphate       |
| <a href="#">PLSP21</a>     | Amino-acid biosynthesis ; L-arginine biosynthesis ; N(2)-acetyl-L-ornithine from L-glutamate                  |
| <a href="#">PLSP21</a>     | Amino-acid biosynthesis ; L-arginine biosynthesis ; N(2)-acetyl-L-ornithine from L-glutamate                  |
| <a href="#">PLSP22</a>     | Amino-acid biosynthesis ; L-arginine biosynthesis ; carbamoyl phosphate from HCO(3) (-)                       |
| <a href="#">PLSP24</a>     | Amino-acid biosynthesis ; L-cysteine biosynthesis ; L-cysteine from L-serine                                  |
| <a href="#">PLSP24</a>     | Amino-acid biosynthesis ; L-cysteine biosynthesis ; L-cysteine from L-serine                                  |
| <a href="#">PLSP27</a>     | Amino-acid biosynthesis ; L-histidine biosynthesis ; L-histidine from 5-phospho-alpha-D-ribose 1-diphosphate  |
| <a href="#">PLSP27</a>     | Amino-acid biosynthesis ; L-histidine biosynthesis ; L-histidine from 5-phospho-alpha-D-ribose 1-diphosphate  |
| <a href="#">PLSP27</a>     | Amino-acid biosynthesis ; L-histidine biosynthesis ; L-histidine from 5-phospho-alpha-D-ribose 1-diphosphate  |
| <a href="#">PLSP27</a>     | Amino-acid biosynthesis ; L-histidine biosynthesis ; L-histidine from 5-phospho-alpha-D-ribose 1-diphosphate  |
| <a href="#">PLSP28</a>     | Amino-acid biosynthesis ; L-isoleucine biosynthesis ; 2-oxobutanoate from L-threonine                         |
| <a href="#">PLSP29</a>     | Amino-acid biosynthesis ; L-isoleucine biosynthesis ; L-isoleucine from 2-oxobutanoate                        |
| <a href="#">PLSP29</a>     | Amino-acid biosynthesis ; L-isoleucine biosynthesis ; L-isoleucine from 2-oxobutanoate                        |
| <a href="#">PLSP30</a>     | Amino-acid biosynthesis ; L-leucine biosynthesis ; L-leucine from 3-methyl-2-oxobutanoate                     |
| <a href="#">PLSP30</a>     | Amino-acid biosynthesis ; L-leucine biosynthesis ; L-leucine from 3-methyl-2-oxobutanoate                     |
| <a href="#">PLSP31</a>     | Amino-acid biosynthesis ; L-lysine biosynthesis via AAA pathway ; L-alpha-aminoadipate from 2-oxoglutarate    |
| <a href="#">PLSP31</a>     | Amino-acid biosynthesis ; L-lysine biosynthesis via AAA pathway ; L-alpha-aminoadipate from 2-oxoglutarate    |
| <a href="#">PLSP37</a>     | Amino-acid biosynthesis ; L-methionine biosynthesis via de novo pathway ; L-homocysteine from L-cystathionine |
| <a href="#">PLSP43</a>     | Amino-acid biosynthesis ; L-phenylalanine biosynthesis ; phenylpyruvate from prephenate                       |

[PLSP44](#) Amino-acid biosynthesis ; L-proline biosynthesis ; L-glutamate 5-semialdehyde from L-glutamate

[PLSP45](#) Amino-acid biosynthesis ; L-proline biosynthesis ; L-glutamate 5-semialdehyde from L-ornithine

[PLSP46](#) Amino-acid biosynthesis ; L-proline biosynthesis ; L-proline from L-glutamate 5-semialdehyde

[PLSP49](#) Amino-acid biosynthesis ; L-tryptophan biosynthesis ; L-tryptophan from chorismate

[PLSP51](#) Amino-acid biosynthesis ; L-valine biosynthesis ; L-valine from pyruvate

[PLSP51](#) Amino-acid biosynthesis ; L-valine biosynthesis ; L-valine from pyruvate

[PLSP53](#) Amino-acid biosynthesis ; homocysteine biosynthesis ; L-homocysteine from S-adenosyl-L-homocysteine

[PLSP54](#) Amino-acid biosynthesis; L-methionine biosynthesis via de novo pathway

[PLSP56](#) Amino-acid degradation ; L-alanine degradation via transaminase pathway ; pyruvate from L-alanine

[PLSP58](#) Amino-acid degradation ; L-kynurenine degradation ; L-alanine and anthranilate from L-kynurenine

[PLSP59](#) Amino-acid degradation ; L-kynurenine degradation ; kynurenic acid from L-kynurenine

[PLSP62](#) Amino-acid degradation ; L-lysine degradation via saccharopine pathway ; glutaryl-CoA from L-lysine

[PLSP62](#) Amino-acid degradation ; L-lysine degradation via saccharopine pathway ; glutaryl-CoA from L-lysine

[PLSP63](#) Amino-acid degradation ; L-phenylalanine degradation ; acetoacetic acid and fumarate from L-phenylalanine

[PLSP64](#) Amino-acid degradation ; L-proline degradation into L-glutamate ; L-glutamate from L-proline

[PLSP67](#) Amino-acid degradation; 4-aminobutanoate degradation

[PLSP74](#) Amino-sugar metabolism; N-acetylneuraminic acid metabolism

[PLSP75](#) Aminoacyl-tRNA biosynthesis ; selenocysteinyl-tRNA(Sec) biosynthesis ; L-seryl-tRNA(Sec) from L-serine and tRNA(Sec)

[PLSP81](#) Carbohydrate biosynthesis; Calvin cycle

[PLSP82](#) Carbohydrate biosynthesis; gluconeogenesis

[PLSP83](#) Carbohydrate degradation ; glycolysis ; D-glyceraldehyde 3-phosphate and glycerone phosphate from D-glucose

[PLSP83](#) Carbohydrate degradation ; glycolysis ; D-glyceraldehyde 3-phosphate and glycerone phosphate from D-glucose

[PLSP85](#) Carbohydrate degradation ; glycolysis ; pyruvate from D-glyceraldehyde 3-phosphate

[PLSP85](#) Carbohydrate degradation ; glycolysis ; pyruvate from D-glyceraldehyde 3-phosphate

[PLSP85](#) Carbohydrate degradation ; glycolysis ; pyruvate from D-glyceraldehyde 3-phosphate

[PLSP85](#) Carbohydrate degradation ; glycolysis ; pyruvate from D-glyceraldehyde 3-phosphate

[PLSP85](#) Carbohydrate degradation ; glycolysis ; pyruvate from D-glyceraldehyde 3-phosphate

[PLSP88](#) Carbohydrate degradation ; pentose phosphate pathway ; D-ribulose 5-phosphate from D-glucose 6-phosphate (oxidative stage)

[PLSP88](#) Carbohydrate degradation ; pentose phosphate pathway ; D-ribulose 5-phosphate from D-glucose 6-phosphate (oxidative stage)

[PLSP92](#) Carbohydrate metabolism ; glyoxylate cycle ; L-malate from isocitrate

[PLSP94](#) Carbohydrate metabolism; hexose metabolism

[PLSP96](#) Carbohydrate metabolism; tricarboxylic acid cycle

[PLSP99](#) Carotenoid biosynthesis ; phytoene biosynthesis ; phytoene from geranylgeranyl-PP

[PLSP100](#) Carotenoid biosynthesis; alpha-zeacarotene biosynthesis

[PLSP101](#) Carotenoid biosynthesis; beta-carotene biosynthesis

[PLSP102](#) Carotenoid biosynthesis; beta-zeacarotene biosynthesis

[PLSP103](#) Carotenoid biosynthesis; delta-carotene biosynthesis

[PLSP104](#) Carotenoid biosynthesis; lycopene biosynthesis

[PLSP111](#) Cofactor biosynthesis ; FMN biosynthesis ; FMN from riboflavin (ATP route)

[PLSP112](#) Cofactor biosynthesis ; NAD(+) biosynthesis ; NAD(+) from nicotinamide ribonucleotide

[PLSP113](#) Cofactor biosynthesis ; NAD(+) biosynthesis ; nicotinamide ribonucleotide from 5-phospho-alpha-D-ribose 1-diphosphate and nicotinamide

[PLSP114](#) Cofactor biosynthesis ; NAD(+) biosynthesis ; nicotinate ribonucleotide from nicotinate

[PLSP116](#) Cofactor biosynthesis ; NAD(+) biosynthesis ; pyridine-2,3-dicarboxylate from L-kynurenine

[PLSP116](#) Cofactor biosynthesis ; NAD(+) biosynthesis ; pyridine-2,3-dicarboxylate from L-kynurenine

[PLSP121](#) Cofactor biosynthesis ; coenzyme A biosynthesis ; coenzyme A from pantothenate

[PLSP124](#) Cofactor biosynthesis ; pantothenate biosynthesis ; pantothenate from beta-alanine and pantoate

[PLSP129](#) Cofactor biosynthesis ; tetrahydrofolate biosynthesis ; 2-amino-4-hydroxy-6-hydroxymethyl-7,8-dihydropteridine diphosphate from 2-amino-4-hydroxy-6-(erythro-1,2,3-trihydroxypropyl)-dihydropteridine triphosphate

[PLSP129](#) Cofactor biosynthesis ; tetrahydrofolate biosynthesis ; 2-amino-4-hydroxy-6-hydroxymethyl-7,8-dihydropteridine diphosphate from 2-amino-4-hydroxy-6-(erythro-1,2,3-trihydroxypropyl)-dihydropteridine triphosphate

[PLSP130](#) Cofactor biosynthesis ; tetrahydrofolate biosynthesis ; 4-aminobenzoate from chorismate

[PLSP130](#) Cofactor biosynthesis ; tetrahydrofolate biosynthesis ; 4-aminobenzoate from chorismate

[PLSP131](#) Cofactor biosynthesis ; tetrahydrofolate biosynthesis ; dihydrofolate from 2-amino-4-hydroxy-6-hydroxymethyl-7,8-dihydropteridine diphosphate and 4-aminobenzoate

[PLSP135](#) Cofactor biosynthesis; molybdopterin biosynthesis

[PLSP139](#) Cofactor biosynthesis; tetrahydrofolylpolyglutamate biosynthesis

[PLSP140](#) Cofactor biosynthesis; thiamine pyrophosphate biosynthesis

[PLSP143](#) Cofactor degradation ; B6 vitamers degradation ; pyridoxal from pyridoxine (dehydrogenase route)

[PLSP144](#) Cofactor metabolism; retinol metabolism

[PLSP146](#) Energy metabolism; nitrogen metabolism

[PLSP149](#) Energy metabolism; sulfur metabolism

[PLSP152](#) Genetic information processing; DNA replication

[PLSP155](#) Glycan biosynthesis; starch biosynthesis

[PLSP156](#) Glycan biosynthesis; sucrose metabolism

[PLSP159](#) Glycan metabolism ; pectin degradation ; 2-dehydro-3-deoxy-D-gluconic acid from pectin

[PLSP159](#) Glycan metabolism ; pectin degradation ; 2-dehydro-3-deoxy-D-gluconic acid from pectin

[PLSP161](#) Glycan metabolism; N-glycan degradation

[PLSP162](#) Glycan metabolism; N-glycan metabolism

[PLSP165](#) Glycan metabolism; chondroitin sulfate biosynthesis

[PLSP166](#) Glycan metabolism; heparan sulfate biosynthesis

[PLSP167](#) Glycan metabolism; heparin biosynthesis

[PLSP169](#) Glycerolipid metabolism; ether lipid biosynthesis

[PLSP173](#) Glycolipid biosynthesis; glycosylphosphatidylinositol-anchor biosynthesis

[PLSP176](#) Isoprenoid biosynthesis ; dimethylallyl-PP biosynthesis ; dimethylallyl-PP from isopentenyl-PP

[PLSP177](#) Isoprenoid biosynthesis ; farnesyl-PP biosynthesis ; farnesyl-PP from geranyl-PP and isopentenyl-PP

[PLSP178](#) Isoprenoid biosynthesis ; geranyl-PP biosynthesis ; geranyl-PP from dimethylallyl-PP and isopentenyl-PP

[PLSP179](#) Isoprenoid biosynthesis ; geranylgeranyl-PP biosynthesis ; geranylgeranyl-PP from farnesyl-PP and isopentenyl-PP

[PLSP180](#) Isoprenoid biosynthesis ; isopentenyl-PP biosynthesis via DXP pathway ; isopentenyl-PP from 1-deoxy-D-xylulose 5-phosphate

[PLSP181](#) Isoprenoid biosynthesis ; isopentenyl-PP biosynthesis via mevalonic acid pathway ; isopentenyl-PP from (R)-mevalonic acid

[PLSP181](#) Isoprenoid biosynthesis ; isopentenyl-PP biosynthesis via mevalonic acid pathway ; isopentenyl-PP from (R)-mevalonic acid

[PLSP183](#) Lipid metabolism ; malonyl-CoA biosynthesis ; malonyl-CoA from acetyl-CoA

[PLSP186](#) Lipid metabolism; bile acid biosynthesis  
[PLSP187](#) Lipid metabolism; fatty acid beta-oxidation  
[PLSP188](#) Lipid metabolism; fatty acid biosynthesis  
[PLSP189](#) Lipid metabolism; fatty acid metabolism  
[PLSP190](#) Lipid metabolism; glycerolipid metabolism  
[PLSP192](#) Lipid metabolism; leukotriene B4 biosynthesis  
[PLSP194](#) Lipid metabolism; leukotriene D4 biosynthesis  
[PLSP197](#) Lipid metabolism; oxylipin biosynthesis  
[PLSP199](#) Lipid metabolism; phospholipid metabolism  
[PLSP200](#) Lipid metabolism; polyunsaturated fatty acid biosynthesis  
[PLSP201](#) Lipid metabolism; prostaglandin biosynthesis  
[PLSP202](#) Lipid metabolism; sphingolipid metabolism  
[PLSP203](#) Lipid metabolism; steroid biosynthesis  
[PLSP209](#) Metabolic intermediate biosynthesis ; chorismate biosynthesis ; chorismate from D-erythrose 4-phosphate and PEP  
[PLSP209](#) Metabolic intermediate biosynthesis ; chorismate biosynthesis ; chorismate from D-erythrose 4-phosphate and PEP  
[PLSP209](#) Metabolic intermediate biosynthesis ; chorismate biosynthesis ; chorismate from D-erythrose 4-phosphate and PEP  
[PLSP209](#) Metabolic intermediate biosynthesis ; chorismate biosynthesis ; chorismate from D-erythrose 4-phosphate and PEP  
[PLSP209](#) Metabolic intermediate biosynthesis ; chorismate biosynthesis ; chorismate from D-erythrose 4-phosphate and PEP  
[PLSP210](#) Metabolic intermediate biosynthesis ; mevalonic acid biosynthesis ; (R)-mevalonic acid from acetyl-CoA  
[PLSP210](#) Metabolic intermediate biosynthesis ; mevalonic acid biosynthesis ; (R)-mevalonic acid from acetyl-CoA  
[PLSP210](#) Metabolic intermediate biosynthesis ; mevalonic acid biosynthesis ; (R)-mevalonic acid from acetyl-CoA  
[PLSP221](#) Nitrogen metabolism ; urea cycle ; L-ornithine and urea from L-arginine  
[PLSP227](#) One-carbon metabolism; tetrahydrofolate pathway  
[PLSP229](#) Organic acid metabolism; propionic acid degradation  
[PLSP231](#) Phospholipid metabolism ; CDP-diacylglycerol biosynthesis ; CDP-diacylglycerol from sn-glycerol 3-phosphate  
[PLSP231](#) Phospholipid metabolism ; CDP-diacylglycerol biosynthesis ; CDP-diacylglycerol from sn-glycerol 3-phosphate  
[PLSP231](#) Phospholipid metabolism ; CDP-diacylglycerol biosynthesis ; CDP-diacylglycerol from sn-glycerol 3-phosphate  
[PLSP232](#) Phospholipid metabolism ; phosphatidylcholine biosynthesis ; phosphatidylcholine from phosphocholine  
[PLSP232](#) Phospholipid metabolism ; phosphatidylcholine biosynthesis ; phosphatidylcholine from phosphocholine  
[PLSP235](#) Phospholipid metabolism ; phosphatidylethanolamine biosynthesis ; phosphatidylethanolamine from CDP-diacylglycerol  
[PLSP235](#) Phospholipid metabolism ; phosphatidylethanolamine biosynthesis ; phosphatidylethanolamine from CDP-diacylglycerol

[PLSP236](#) Phospholipid metabolism ; phosphatidylethanolamine biosynthesis ; phosphatidylethanolamine from ethanolamine

[PLSP243](#) Photosynthesis; C3 acid pathway

[PLSP244](#) Photosynthesis; C4 acid pathway

[PLSP251](#) Plant hormone biosynthesis; abscisic acid biosynthesis

[PLSP253](#) Plant hormone biosynthesis; gibberellin biosynthesis

[PLSP254](#) Plant hormone degradation; abscisic acid degradation

[PLSP260](#) Polyol metabolism ; myo-inositol biosynthesis ; myo-inositol from D-glucose 6-phosphate

[PLSP262](#) Porphyrin biosynthesis; chlorophyll biosynthesis

[PLSP263](#) Porphyrin biosynthesis; chlorophyll biosynthesis (light-independent)

[PLSP264](#) Porphyrin degradation; chlorophyll degradation

[PLSP266](#) Porphyrin metabolism ; protoheme biosynthesis ; protoheme from protoporphyrin-IX

[PLSP267](#) Porphyrin metabolism ; protoporphyrin-IX biosynthesis ; 5-aminolevulinate from L-glutamyl-tRNA(Glu)

[PLSP269](#) Porphyrin metabolism ; protoporphyrin-IX biosynthesis ; coproporphyrinogen III from 5-aminolevulinate

[PLSP269](#) Porphyrin metabolism ; protoporphyrin-IX biosynthesis ; coproporphyrinogen III from 5-aminolevulinate

[PLSP270](#) Porphyrin metabolism ; protoporphyrin-IX biosynthesis ; protoporphyrin-IX from protoporphyrinogen-IX

[PLSP271](#) Porphyrin metabolism ; protoporphyrin-IX biosynthesis ; protoporphyrinogen-IX from coproporphyrinogen III (O2 route)

[PLSP276](#) Protein biosynthesis; polypeptide chain elongation

[PLSP277](#) Protein degradation; proteasomal ubiquitin-dependent pathway

[PLSP278](#) Protein modification ; protein lipoylation via endogenous pathway ; protein N(6)-(lipoyl)lysine from octanoyl-[acyl-carrier-protein]

[PLSP279](#) Protein modification ; protein lipoylation via exogenous pathway ; protein N(6)-(lipoyl)lysine from lipoic acid

[PLSP283](#) Protein modification; protein glycosylation

[PLSP285](#) Protein modification; protein neddylation

[PLSP286](#) Protein modification; protein sumoylation

[PLSP287](#) Protein modification; protein ubiquitination

[PLSP289](#) Purine metabolism ; AMP biosynthesis via de novo pathway ; AMP from IMP

[PLSP290](#) Purine metabolism ; AMP biosynthesis via salvage pathway ; AMP from adenine

[PLSP293](#) Purine metabolism ; IMP biosynthesis via de novo pathway ; 5-amino-1-(5-phospho-D-ribosyl)imidazole-4-carboxamide from N(2)-formyl-N(1)-(5-phospho-D-ribosyl)glycinamide

[PLSP293](#) Purine metabolism ; IMP biosynthesis via de novo pathway ; 5-amino-1-(5-phospho-D-ribosyl)imidazole-4-carboxamide from N(2)-formyl-N(1)-(5-phospho-D-ribosyl)glycinamide

[PLSP296](#) Purine metabolism ; IMP biosynthesis via salvage pathway ; IMP from AMP

[PLSP297](#) Purine metabolism ; IMP biosynthesis via salvage pathway ; IMP from hypoxanthine

[PLSP299](#) Purine metabolism ; cAMP degradation ; AMP from cAMP

[PLSP301](#) Purine metabolism ; uric acid degradation ; (S)-allantoin from uric acid

[PLSP301](#) Purine metabolism ; uric acid degradation ; (S)-allantoin from uric acid

[PLSP303](#) Pyrimidine metabolism ; UMP biosynthesis via de novo pathway ; UMP from HCO(3) (-)

[PLSP303](#) Pyrimidine metabolism ; UMP biosynthesis via de novo pathway ; UMP from HCO(3) (-)

[PLSP303](#) Pyrimidine metabolism ; UMP biosynthesis via de novo pathway ; UMP from HCO(3) (-)

[PLSP303](#) Pyrimidine metabolism ; UMP biosynthesis via de novo pathway ; UMP from HCO(3) (-)

[PLSP304](#) Pyrimidine metabolism ; UMP biosynthesis via salvage pathway ; UMP from uracil

[PLSP307](#) Pyrimidine metabolism ; dUMP biosynthesis ; dUMP from dCTP (dUTP route)

[PLSP311](#) Secondary metabolite biosynthesis; flavonoid biosynthesis

[PLSP313](#) Secondary metabolite metabolism ; methylglyoxal degradation ; D-lactate from methylglyoxal

[PLSP318](#) Steroid biosynthesis ; zymosterol biosynthesis ; zymosterol from lanosterol

[PLSP318](#) Steroid biosynthesis ; zymosterol biosynthesis ; zymosterol from lanosterol

[PLSP318](#) Steroid biosynthesis ; zymosterol biosynthesis ; zymosterol from lanosterol

[PLSP319](#) Steroid biosynthesis; cholesterol biosynthesis

[PLSP321](#) Steroid biosynthesis; estrogen biosynthesis

[PLSP326](#) Sulfur metabolism ; glutathione biosynthesis ; glutathione from L-cysteine and L-glutamate

[PLSP329](#) Sulfur metabolism; glutathione metabolism

[PLSP332](#) Terpene metabolism ; lanosterol biosynthesis ; lanosterol from farnesyl-PP

[PLSP335](#) Terpene metabolism; oleoresin biosynthesis

[PLSP337](#) tRNA modification; wybutosine-tRNA(Phe) biosynthesis
