# Supplementary material for: PathLocdb: a comprehensive database for the subcellular localization of metabolic pathways and its application to multiple localization analysis
Source: PubMed Central journal article supplement (PMC3005916; doi:10.1186/1471-2164-11-s4-s13), 2010-12-02
Supplement: 1471-2164-11-S4-S13-S3.pdf [file 1471-2164-11-S4-S13-S3.pdf]

| Superpathway ID         | Organism taxid | Superpathway name                                                                                                         | Step     | Location              | UniProt accession number |
|-------------------------|----------------|---------------------------------------------------------------------------------------------------------------------------|----------|-----------------------|--------------------------|
| <a href="#">PLSP210</a> | 10029_rodents  | Metabolic intermediate biosynthesis ; mevalonic acid biosynthesis ; (R)-mevalonic acid from acetyl-CoA                    | step 2/3 | cytoplasm             | P13704                   |
| <a href="#">PLSP210</a> | 10029_rodents  | Metabolic intermediate biosynthesis ; mevalonic acid biosynthesis ; (R)-mevalonic acid from acetyl-CoA                    | step 3/3 | endoplasmic reticulum | P00347                   |
| <a href="#">PLSP14</a>  | 10090_rodents  | Amine and polyamine degradation ; betaine degradation ; sarcosine from betaine                                            | step 1/2 | cytoplasm             | O35490                   |
| <a href="#">PLSP14</a>  | 10090_rodents  | Amine and polyamine degradation ; betaine degradation ; sarcosine from betaine                                            | step 2/2 | mitochondria          | Q9DBT9                   |
| <a href="#">PLSP23</a>  | 10090_rodents  | Amino-acid biosynthesis ; L-cysteine biosynthesis ; L-cysteine from L-homocysteine and L-serine                           | step 1/2 | cytoplasm             | Q91WT9                   |
| <a href="#">PLSP23</a>  | 10090_rodents  | Amino-acid biosynthesis ; L-cysteine biosynthesis ; L-cysteine from L-homocysteine and L-serine                           | step 1/2 | nucleus               | Q91WT9                   |
| <a href="#">PLSP23</a>  | 10090_rodents  | Amino-acid biosynthesis ; L-cysteine biosynthesis ; L-cysteine from L-homocysteine and L-serine                           | step 2/2 | cytoplasm             | Q8VCN5                   |
| <a href="#">PLSP63</a>  | 10090_rodents  | Amino-acid degradation ; L-phenylalanine degradation ; acetoacetic acid and fumarate from L-phenylalanine                 | step 3/6 | cell membrane         | P49429                   |
| <a href="#">PLSP63</a>  | 10090_rodents  | Amino-acid degradation ; L-phenylalanine degradation ; acetoacetic acid and fumarate from L-phenylalanine                 | step 3/6 | cytoplasm             | P49429                   |
| <a href="#">PLSP63</a>  | 10090_rodents  | Amino-acid degradation ; L-phenylalanine degradation ; acetoacetic acid and fumarate from L-phenylalanine                 | step 5/6 | cytoplasm             | Q9WVL0                   |
| <a href="#">PLSP116</a> | 10090_rodents  | Cofactor biosynthesis ; NAD(+) biosynthesis ; pyridine-2,3-dicarboxylate from L-kynurenine                                | step 1/3 | mitochondria          | Q91WN4                   |
| <a href="#">PLSP116</a> | 10090_rodents  | Cofactor biosynthesis ; NAD(+) biosynthesis ; pyridine-2,3-dicarboxylate from L-kynurenine                                | step 2/3 | cytoplasm             | Q9CXF0                   |
| <a href="#">PLSP116</a> | 10090_rodents  | Cofactor biosynthesis ; NAD(+) biosynthesis ; pyridine-2,3-dicarboxylate from L-kynurenine                                | step 3/3 | cytoplasm             | Q78JT3                   |
| <a href="#">PLSP181</a> | 10090_rodents  | Isoprenoid biosynthesis ; isopentenyl-PP biosynthesis via mevalonic acid pathway ; isopentenyl-PP from (R)-mevalonic acid | step 1/3 | cytoplasm             | Q9R008                   |
| <a href="#">PLSP181</a> | 10090_rodents  | Isoprenoid biosynthesis ; isopentenyl-PP biosynthesis via mevalonic acid pathway ; isopentenyl-PP from (R)-mevalonic acid | step 1/3 | peroxisome            | Q9R008                   |
| <a href="#">PLSP181</a> | 10090_rodents  | Isoprenoid biosynthesis ; isopentenyl-PP biosynthesis via mevalonic acid pathway ; isopentenyl-PP from (R)-mevalonic acid | step 2/3 | peroxisome            | Q9D1G2                   |
| <a href="#">PLSP231</a> | 10090_rodents  | Phospholipid metabolism ; CDP-diacylglycerol biosynthesis ; CDP-diacylglycerol from sn-glycerol 3-phosphate               | step 1/3 | mitochondria          | Q61586                   |
| <a href="#">PLSP231</a> | 10090_rodents  | Phospholipid metabolism ; CDP-diacylglycerol biosynthesis ; CDP-diacylglycerol from sn-glycerol 3-phosphate               | step 2/3 | endoplasmic reticulum | Q3UN02, Q6NVG1, Q8CON2   |
| <a href="#">PLSP231</a> | 10090_rodents  | Phospholipid metabolism ; CDP-diacylglycerol biosynthesis ; CDP-diacylglycerol from sn-glycerol 3-phosphate               | step 3/3 | cytoplasm             | P98191                   |
| <a href="#">PLSP231</a> | 10090_rodents  | Phospholipid metabolism ; CDP-diacylglycerol biosynthesis ; CDP-diacylglycerol from sn-glycerol 3-phosphate               | step 3/3 | endoplasmic reticulum | P98191                   |

|                         |               |                                                                                                             |          |                       |        |
|-------------------------|---------------|-------------------------------------------------------------------------------------------------------------|----------|-----------------------|--------|
| <a href="#">PLSP231</a> | 10090_rodents | Phospholipid metabolism ; CDP-diacylglycerol biosynthesis ; CDP-diacylglycerol from sn-glycerol 3-phosphate | step 3/3 | mitochondria          | Q99L43 |
| <a href="#">PLSP260</a> | 10090_rodents | Polyol metabolism ; myo-inositol biosynthesis ; myo-inositol from D-glucose 6-phosphate                     | step 1/2 | cytoplasm             | Q9JHU9 |
| <a href="#">PLSP260</a> | 10090_rodents | Polyol metabolism ; myo-inositol biosynthesis ; myo-inositol from D-glucose 6-phosphate                     | step 2/2 | cytoplasm             | 055023 |
| <a href="#">PLSP260</a> | 10090_rodents | Polyol metabolism ; myo-inositol biosynthesis ; myo-inositol from D-glucose 6-phosphate                     | step 2/2 | membrane              | Q80V26 |
| <a href="#">PLSP318</a> | 10090_rodents | Steroid biosynthesis ; zymosterol biosynthesis ; zymosterol from lanosterol                                 | step 3/6 | endoplasmic reticulum | Q9CRA4 |
| <a href="#">PLSP318</a> | 10090_rodents | Steroid biosynthesis ; zymosterol biosynthesis ; zymosterol from lanosterol                                 | step 4/6 | membrane              | Q9R1J0 |
| <a href="#">PLSP318</a> | 10090_rodents | Steroid biosynthesis ; zymosterol biosynthesis ; zymosterol from lanosterol                                 | step 5/6 | cell membrane         | 088736 |
| <a href="#">PLSP332</a> | 10090_rodents | Terpene metabolism ; lanosterol biosynthesis ; lanosterol from farnesyl-PP                                  | step 1/3 | endoplasmic reticulum | P53798 |
| <a href="#">PLSP332</a> | 10090_rodents | Terpene metabolism ; lanosterol biosynthesis ; lanosterol from farnesyl-PP                                  | step 2/3 | endoplasmic reticulum | P52019 |
| <a href="#">PLSP332</a> | 10090_rodents | Terpene metabolism ; lanosterol biosynthesis ; lanosterol from farnesyl-PP                                  | step 2/3 | microsome             | P52019 |
| <a href="#">PLSP14</a>  | 10116_rodents | Amine and polyamine degradation ; betaine degradation ; sarcosine from betaine                              | step 1/2 | cytoplasm             | 009171 |
| <a href="#">PLSP14</a>  | 10116_rodents | Amine and polyamine degradation ; betaine degradation ; sarcosine from betaine                              | step 2/2 | mitochondria          | Q63342 |
| <a href="#">PLSP23</a>  | 10116_rodents | Amino-acid biosynthesis ; L-cysteine biosynthesis ; L-cysteine from L-homocysteine and L-serine             | step 1/2 | cytoplasm             | P32232 |
| <a href="#">PLSP23</a>  | 10116_rodents | Amino-acid biosynthesis ; L-cysteine biosynthesis ; L-cysteine from L-homocysteine and L-serine             | step 1/2 | nucleus               | P32232 |
| <a href="#">PLSP23</a>  | 10116_rodents | Amino-acid biosynthesis ; L-cysteine biosynthesis ; L-cysteine from L-homocysteine and L-serine             | step 2/2 | cytoplasm             | P18757 |
| <a href="#">PLSP116</a> | 10116_rodents | Cofactor biosynthesis ; NAD(+) biosynthesis ; pyridine-2,3-dicarboxylate from L-kynurenine                  | step 1/3 | mitochondria          | 088867 |
| <a href="#">PLSP116</a> | 10116_rodents | Cofactor biosynthesis ; NAD(+) biosynthesis ; pyridine-2,3-dicarboxylate from L-kynurenine                  | step 2/3 | cytoplasm             | P70712 |
| <a href="#">PLSP116</a> | 10116_rodents | Cofactor biosynthesis ; NAD(+) biosynthesis ; pyridine-2,3-dicarboxylate from L-kynurenine                  | step 3/3 | cytoplasm             | P46953 |
| <a href="#">PLSP231</a> | 10116_rodents | Phospholipid metabolism ; CDP-diacylglycerol biosynthesis ; CDP-diacylglycerol from sn-glycerol 3-phosphate | step 1/3 | mitochondria          | P97564 |
| <a href="#">PLSP231</a> | 10116_rodents | Phospholipid metabolism ; CDP-diacylglycerol biosynthesis ; CDP-diacylglycerol from sn-glycerol 3-phosphate | step 2/3 | endoplasmic reticulum | Q4V8J4 |
| <a href="#">PLSP231</a> | 10116_rodents | Phospholipid metabolism ; CDP-diacylglycerol biosynthesis ; CDP-diacylglycerol from sn-glycerol 3-phosphate | step 3/3 | cytoplasm             | 035052 |

|                         |               |                                                                                                             |          |                       |                |
|-------------------------|---------------|-------------------------------------------------------------------------------------------------------------|----------|-----------------------|----------------|
| <a href="#">PLSP231</a> | 10116_rodents | Phospholipid metabolism ; CDP-diacylglycerol biosynthesis ; CDP-diacylglycerol from sn-glycerol 3-phosphate | step 3/3 | endoplasmic reticulum | Q35052         |
| <a href="#">PLSP231</a> | 10116_rodents | Phospholipid metabolism ; CDP-diacylglycerol biosynthesis ; CDP-diacylglycerol from sn-glycerol 3-phosphate | step 3/3 | mitochondria          | Q91XU8         |
| <a href="#">PLSP318</a> | 10116_rodents | Steroid biosynthesis ; zymosterol biosynthesis ; zymosterol from lanosterol                                 | step 1/6 | endoplasmic reticulum | Q64654         |
| <a href="#">PLSP318</a> | 10116_rodents | Steroid biosynthesis ; zymosterol biosynthesis ; zymosterol from lanosterol                                 | step 1/6 | microsome             | Q64654         |
| <a href="#">PLSP318</a> | 10116_rodents | Steroid biosynthesis ; zymosterol biosynthesis ; zymosterol from lanosterol                                 | step 3/6 | endoplasmic reticulum | Q35532         |
| <a href="#">PLSP318</a> | 10116_rodents | Steroid biosynthesis ; zymosterol biosynthesis ; zymosterol from lanosterol                                 | step 4/6 | membrane              | Q5PPL3         |
| <a href="#">PLSP318</a> | 10116_rodents | Steroid biosynthesis ; zymosterol biosynthesis ; zymosterol from lanosterol                                 | step 5/6 | cell membrane         | Q62904         |
| <a href="#">PLSP332</a> | 10116_rodents | Terpene metabolism ; lanosterol biosynthesis ; lanosterol from farnesyl-PP                                  | step 1/3 | endoplasmic reticulum | Q02769         |
| <a href="#">PLSP332</a> | 10116_rodents | Terpene metabolism ; lanosterol biosynthesis ; lanosterol from farnesyl-PP                                  | step 2/3 | endoplasmic reticulum | P52020         |
| <a href="#">PLSP332</a> | 10116_rodents | Terpene metabolism ; lanosterol biosynthesis ; lanosterol from farnesyl-PP                                  | step 2/3 | microsome             | P52020         |
| <a href="#">PLSP116</a> | 13684_fungi   | Cofactor biosynthesis ; NAD(+) biosynthesis ; pyridine-2,3-dicarboxylate from L-kynurenine                  | step 1/3 | mitochondria          | Q0V5K1         |
| <a href="#">PLSP116</a> | 13684_fungi   | Cofactor biosynthesis ; NAD(+) biosynthesis ; pyridine-2,3-dicarboxylate from L-kynurenine                  | step 2/3 | cytoplasm             | Q0UIN2, Q0UZK0 |
| <a href="#">PLSP116</a> | 162425_fungi  | Cofactor biosynthesis ; NAD(+) biosynthesis ; pyridine-2,3-dicarboxylate from L-kynurenine                  | step 1/3 | mitochondria          | Q5B2N0         |
| <a href="#">PLSP116</a> | 162425_fungi  | Cofactor biosynthesis ; NAD(+) biosynthesis ; pyridine-2,3-dicarboxylate from L-kynurenine                  | step 2/3 | cytoplasm             | Q5B0H8, Q5BC73 |
| <a href="#">PLSP116</a> | 331117_fungi  | Cofactor biosynthesis ; NAD(+) biosynthesis ; pyridine-2,3-dicarboxylate from L-kynurenine                  | step 1/3 | mitochondria          | A1DMD5         |
| <a href="#">PLSP116</a> | 331117_fungi  | Cofactor biosynthesis ; NAD(+) biosynthesis ; pyridine-2,3-dicarboxylate from L-kynurenine                  | step 2/3 | cytoplasm             | A1DGW4, A1CWY1 |
| <a href="#">PLSP116</a> | 331117_fungi  | Cofactor biosynthesis ; NAD(+) biosynthesis ; pyridine-2,3-dicarboxylate from L-kynurenine                  | step 3/3 | cytoplasm             | A1DB76         |
| <a href="#">PLSP116</a> | 33169_fungi   | Cofactor biosynthesis ; NAD(+) biosynthesis ; pyridine-2,3-dicarboxylate from L-kynurenine                  | step 1/3 | mitochondria          | Q751I2         |
| <a href="#">PLSP116</a> | 33169_fungi   | Cofactor biosynthesis ; NAD(+) biosynthesis ; pyridine-2,3-dicarboxylate from L-kynurenine                  | step 2/3 | cytoplasm             | Q750P5         |
| <a href="#">PLSP116</a> | 33169_fungi   | Cofactor biosynthesis ; NAD(+) biosynthesis ; pyridine-2,3-dicarboxylate from L-kynurenine                  | step 3/3 | cytoplasm             | Q75CP6         |
| <a href="#">PLSP332</a> | 33169_fungi   | Terpene metabolism ; lanosterol biosynthesis ; lanosterol from farnesyl-PP                                  | step 1/3 | endoplasmic reticulum | Q752X9         |
| <a href="#">PLSP332</a> | 33169_fungi   | Terpene metabolism ; lanosterol biosynthesis ; lanosterol from farnesyl-PP                                  | step 2/3 | endoplasmic reticulum | Q75F69         |

|                         |              |                                                                                                        |          |                       |                                        |
|-------------------------|--------------|--------------------------------------------------------------------------------------------------------|----------|-----------------------|----------------------------------------|
| <a href="#">PLSP332</a> | 33169_fungi  | Terpene metabolism ; lanosterol biosynthesis ; lanosterol from farnesyl-PP                             | step 2/3 | microsome             | Q75F69                                 |
| <a href="#">PLSP116</a> | 341663_fungi | Cofactor biosynthesis ; NAD(+) biosynthesis ; pyridine-2,3-dicarboxylate from L-kynurenine             | step 1/3 | mitochondria          | Q0CRI5                                 |
| <a href="#">PLSP116</a> | 341663_fungi | Cofactor biosynthesis ; NAD(+) biosynthesis ; pyridine-2,3-dicarboxylate from L-kynurenine             | step 2/3 | cytoplasm             | Q0CPB0, Q0CZX6                         |
| <a href="#">PLSP116</a> | 341663_fungi | Cofactor biosynthesis ; NAD(+) biosynthesis ; pyridine-2,3-dicarboxylate from L-kynurenine             | step 3/3 | cytoplasm             | Q0DIU6                                 |
| <a href="#">PLSP62</a>  | 3702_plants  | Amino-acid degradation ; L-lysine degradation via saccharopine pathway ; glutaryl-CoA from L-lysine    | step 1/6 | cytoplasm             | Q9SMZ4                                 |
| <a href="#">PLSP62</a>  | 3702_plants  | Amino-acid degradation ; L-lysine degradation via saccharopine pathway ; glutaryl-CoA from L-lysine    | step 2/6 | cytoplasm             | Q9SMZ4                                 |
| <a href="#">PLSP62</a>  | 3702_plants  | Amino-acid degradation ; L-lysine degradation via saccharopine pathway ; glutaryl-CoA from L-lysine    | step 2/6 | mitochondria          | Q8LGI2                                 |
| <a href="#">PLSP210</a> | 3702_plants  | Metabolic intermediate biosynthesis ; mevalonic acid biosynthesis ; (R)-mevalonic acid from acetyl-CoA | step 1/3 | cytoplasm             | Q8S4Y1                                 |
| <a href="#">PLSP210</a> | 3702_plants  | Metabolic intermediate biosynthesis ; mevalonic acid biosynthesis ; (R)-mevalonic acid from acetyl-CoA | step 3/3 | endoplasmic reticulum | P14891, P43256                         |
| <a href="#">PLSP301</a> | 3702_plants  | Purine metabolism ; uric acid degradation ; (S)-allantoin from uric acid                               | step 1/3 | peroxisome            | 004420                                 |
| <a href="#">PLSP301</a> | 3702_plants  | Purine metabolism ; uric acid degradation ; (S)-allantoin from uric acid                               | step 2/3 | cell membrane         | Q9LVM5                                 |
| <a href="#">PLSP301</a> | 3702_plants  | Purine metabolism ; uric acid degradation ; (S)-allantoin from uric acid                               | step 3/3 | cell membrane         | Q9LVM5                                 |
| <a href="#">PLSP332</a> | 3702_plants  | Terpene metabolism ; lanosterol biosynthesis ; lanosterol from farnesyl-PP                             | step 1/3 | endoplasmic reticulum | P53799                                 |
| <a href="#">PLSP332</a> | 3702_plants  | Terpene metabolism ; lanosterol biosynthesis ; lanosterol from farnesyl-PP                             | step 2/3 | membrane              | 065404, 065402, 065403                 |
| <a href="#">PLSP116</a> | 38033_fungi  | Cofactor biosynthesis ; NAD(+) biosynthesis ; pyridine-2,3-dicarboxylate from L-kynurenine             | step 1/3 | mitochondria          | Q2GQG8                                 |
| <a href="#">PLSP116</a> | 38033_fungi  | Cofactor biosynthesis ; NAD(+) biosynthesis ; pyridine-2,3-dicarboxylate from L-kynurenine             | step 2/3 | cytoplasm             | Q2H9P7, Q2H7G2                         |
| <a href="#">PLSP116</a> | 38033_fungi  | Cofactor biosynthesis ; NAD(+) biosynthesis ; pyridine-2,3-dicarboxylate from L-kynurenine             | step 3/3 | cytoplasm             | Q2HD63                                 |
| <a href="#">PLSP6</a>   | 4058_plants  | Alkaloid biosynthesis ; vindoline biosynthesis ; vindoline from tabersonine                            | step 1/6 | endoplasmic reticulum | P98183                                 |
| <a href="#">PLSP6</a>   | 4058_plants  | Alkaloid biosynthesis ; vindoline biosynthesis ; vindoline from tabersonine                            | step 5/6 | cytoplasm             | 004847                                 |
| <a href="#">PLSP159</a> | 4081_plants  | Glycan metabolism ; pectin degradation ; 2-dehydro-3-deoxy-D-gluconic acid from pectin                 | step 1/5 | cell wall             | P14280, P09607, Q96575, Q96576, Q43143 |
| <a href="#">PLSP159</a> | 4081_plants  | Glycan metabolism ; pectin degradation ; 2-dehydro-3-deoxy-D-gluconic acid from pectin                 | step 1/5 | extracellular         | P14280, P09607, Q96575, Q96576, Q43143 |
| <a href="#">PLSP159</a> | 4081_plants  | Glycan metabolism ; pectin degradation ; 2-dehydro-3-deoxy-D-gluconic acid from pectin                 | step 2/5 | extracellular         | P24396                                 |
| <a href="#">PLSP116</a> | 425011_fungi | Cofactor biosynthesis ; NAD(+) biosynthesis ; pyridine-2,3-dicarboxylate from L-kynurenine             | step 1/3 | mitochondria          | A2Q9N7, A2QMH1, A2QPD9                 |

|                         |                     |                                                                                                            |          |              |                        |
|-------------------------|---------------------|------------------------------------------------------------------------------------------------------------|----------|--------------|------------------------|
| <a href="#">PLSP116</a> | 425011_fungi        | Cofactor biosynthesis ; NAD(+) biosynthesis ; pyridine-2,3-dicarboxylate from L-kynurenine                 | step 2/3 | cytoplasm    | A2R7T0, A2QJI5         |
| <a href="#">PLSP116</a> | 425011_fungi        | Cofactor biosynthesis ; NAD(+) biosynthesis ; pyridine-2,3-dicarboxylate from L-kynurenine                 | step 3/3 | cytoplasm    | A2R8S7                 |
| <a href="#">PLSP116</a> | 44689_invertebrates | Cofactor biosynthesis ; NAD(+) biosynthesis ; pyridine-2,3-dicarboxylate from L-kynurenine                 | step 1/3 | mitochondria | Q54RE8                 |
| <a href="#">PLSP116</a> | 44689_invertebrates | Cofactor biosynthesis ; NAD(+) biosynthesis ; pyridine-2,3-dicarboxylate from L-kynurenine                 | step 2/3 | cytoplasm    | Q54Q04                 |
| <a href="#">PLSP116</a> | 44689_invertebrates | Cofactor biosynthesis ; NAD(+) biosynthesis ; pyridine-2,3-dicarboxylate from L-kynurenine                 | step 3/3 | cytoplasm    | Q54S02                 |
| <a href="#">PLSP116</a> | 451804_fungi        | Cofactor biosynthesis ; NAD(+) biosynthesis ; pyridine-2,3-dicarboxylate from L-kynurenine                 | step 1/3 | mitochondria | B0Y7C3                 |
| <a href="#">PLSP116</a> | 451804_fungi        | Cofactor biosynthesis ; NAD(+) biosynthesis ; pyridine-2,3-dicarboxylate from L-kynurenine                 | step 2/3 | cytoplasm    | B0XS72, B0Y6H2         |
| <a href="#">PLSP116</a> | 451804_fungi        | Cofactor biosynthesis ; NAD(+) biosynthesis ; pyridine-2,3-dicarboxylate from L-kynurenine                 | step 3/3 | cytoplasm    | B0Y9Z9, B0XVP0         |
| <a href="#">PLSP29</a>  | 4896_fungi          | Amino-acid biosynthesis ; L-isoleucine biosynthesis ; L-isoleucine from 2-oxobutanoate                     | step 1/4 | cytoplasm    | 060086                 |
| <a href="#">PLSP29</a>  | 4896_fungi          | Amino-acid biosynthesis ; L-isoleucine biosynthesis ; L-isoleucine from 2-oxobutanoate                     | step 1/4 | mitochondria | P36620                 |
| <a href="#">PLSP29</a>  | 4896_fungi          | Amino-acid biosynthesis ; L-isoleucine biosynthesis ; L-isoleucine from 2-oxobutanoate                     | step 2/4 | mitochondria | P78827                 |
| <a href="#">PLSP29</a>  | 4896_fungi          | Amino-acid biosynthesis ; L-isoleucine biosynthesis ; L-isoleucine from 2-oxobutanoate                     | step 3/4 | mitochondria | Q10318                 |
| <a href="#">PLSP31</a>  | 4896_fungi          | Amino-acid biosynthesis ; L-lysine biosynthesis via AAA pathway ; L-alpha-aminoadipate from 2-oxoglutarate | step 1/4 | mitochondria | Q9Y823                 |
| <a href="#">PLSP31</a>  | 4896_fungi          | Amino-acid biosynthesis ; L-lysine biosynthesis via AAA pathway ; L-alpha-aminoadipate from 2-oxoglutarate | step 2/4 | mitochondria | Q9UT74                 |
| <a href="#">PLSP31</a>  | 4896_fungi          | Amino-acid biosynthesis ; L-lysine biosynthesis via AAA pathway ; L-alpha-aminoadipate from 2-oxoglutarate | step 3/4 | cytoplasm    | 014104                 |
| <a href="#">PLSP51</a>  | 4896_fungi          | Amino-acid biosynthesis ; L-valine biosynthesis ; L-valine from pyruvate                                   | step 1/4 | cytoplasm    | 060086                 |
| <a href="#">PLSP51</a>  | 4896_fungi          | Amino-acid biosynthesis ; L-valine biosynthesis ; L-valine from pyruvate                                   | step 1/4 | mitochondria | P36620                 |
| <a href="#">PLSP51</a>  | 4896_fungi          | Amino-acid biosynthesis ; L-valine biosynthesis ; L-valine from pyruvate                                   | step 2/4 | mitochondria | P78827                 |
| <a href="#">PLSP51</a>  | 4896_fungi          | Amino-acid biosynthesis ; L-valine biosynthesis ; L-valine from pyruvate                                   | step 3/4 | mitochondria | Q10318                 |
| <a href="#">PLSP85</a>  | 4896_fungi          | Carbohydrate degradation ; glycolysis ; pyruvate from D-glyceraldehyde 3-phosphate                         | step 1/5 | cytoplasm    | P78958, 043026         |
| <a href="#">PLSP85</a>  | 4896_fungi          | Carbohydrate degradation ; glycolysis ; pyruvate from D-glyceraldehyde 3-phosphate                         | step 2/5 | cytoplasm    | 060101                 |
| <a href="#">PLSP85</a>  | 4896_fungi          | Carbohydrate degradation ; glycolysis ; pyruvate from D-glyceraldehyde 3-phosphate                         | step 3/5 | cytoplasm    | 094461, Q9UT63         |
| <a href="#">PLSP85</a>  | 4896_fungi          | Carbohydrate degradation ; glycolysis ; pyruvate from D-glyceraldehyde 3-phosphate                         | step 3/5 | nucleus      | 094461, Q9UT63, 094420 |

|                         |            |                                                                                                                       |          |                          |                    |
|-------------------------|------------|-----------------------------------------------------------------------------------------------------------------------|----------|--------------------------|--------------------|
| <a href="#">PLSP85</a>  | 4896_fungi | Carbohydrate degradation ; glycolysis ;<br>pyruvate from D-glyceraldehyde 3-<br>phosphate                             | step 4/5 | cytoplasm                | P40370, Q8NKC<br>2 |
| <a href="#">PLSP209</a> | 4896_fungi | Metabolic intermediate biosynthesis ;<br>chorismate biosynthesis ; chorismate from<br>D-erythrose 4-phosphate and PEP | step 1/7 | cytoplasm                | Q9UT09             |
| <a href="#">PLSP209</a> | 4896_fungi | Metabolic intermediate biosynthesis ;<br>chorismate biosynthesis ; chorismate from<br>D-erythrose 4-phosphate and PEP | step 1/7 | nucleus                  | Q9UT09             |
| <a href="#">PLSP209</a> | 4896_fungi | Metabolic intermediate biosynthesis ;<br>chorismate biosynthesis ; chorismate from<br>D-erythrose 4-phosphate and PEP | step 2/7 | cytoplasm                | Q9P7R0             |
| <a href="#">PLSP209</a> | 4896_fungi | Metabolic intermediate biosynthesis ;<br>chorismate biosynthesis ; chorismate from<br>D-erythrose 4-phosphate and PEP | step 3/7 | cytoplasm                | Q9P7R0             |
| <a href="#">PLSP209</a> | 4896_fungi | Metabolic intermediate biosynthesis ;<br>chorismate biosynthesis ; chorismate from<br>D-erythrose 4-phosphate and PEP | step 4/7 | cytoplasm                | Q9P7R0             |
| <a href="#">PLSP209</a> | 4896_fungi | Metabolic intermediate biosynthesis ;<br>chorismate biosynthesis ; chorismate from<br>D-erythrose 4-phosphate and PEP | step 5/7 | cytoplasm                | Q9P7R0             |
| <a href="#">PLSP209</a> | 4896_fungi | Metabolic intermediate biosynthesis ;<br>chorismate biosynthesis ; chorismate from<br>D-erythrose 4-phosphate and PEP | step 6/7 | cytoplasm                | Q9P7R0             |
| <a href="#">PLSP210</a> | 4896_fungi | Metabolic intermediate biosynthesis ;<br>mevalonic acid biosynthesis ; (R)-<br>mevalonic acid from acetyl-CoA         | step 1/3 | cytoplasm                | Q9UQW6             |
| <a href="#">PLSP210</a> | 4896_fungi | Metabolic intermediate biosynthesis ;<br>mevalonic acid biosynthesis ; (R)-<br>mevalonic acid from acetyl-CoA         | step 3/3 | endoplasmic<br>reticulum | Q10283             |
| <a href="#">PLSP318</a> | 4896_fungi | Steroid biosynthesis ; zymosterol<br>biosynthesis ; zymosterol from lanosterol                                        | step 1/6 | endoplasmic<br>reticulum | Q09736             |
| <a href="#">PLSP318</a> | 4896_fungi | Steroid biosynthesis ; zymosterol<br>biosynthesis ; zymosterol from lanosterol                                        | step 2/6 | membrane                 | Q09195             |
| <a href="#">PLSP318</a> | 4896_fungi | Steroid biosynthesis ; zymosterol<br>biosynthesis ; zymosterol from lanosterol                                        | step 3/6 | endoplasmic<br>reticulum | Q9UUH4             |
| <a href="#">PLSP318</a> | 4896_fungi | Steroid biosynthesis ; zymosterol<br>biosynthesis ; zymosterol from lanosterol                                        | step 4/6 | endoplasmic<br>reticulum | 043050             |
| <a href="#">PLSP324</a> | 4896_fungi | Steroid metabolism ; ergosterol<br>biosynthesis ; ergosterol from zymosterol                                          | step 2/5 | endoplasmic<br>reticulum | P87113             |
| <a href="#">PLSP324</a> | 4896_fungi | Steroid metabolism ; ergosterol<br>biosynthesis ; ergosterol from zymosterol                                          | step 3/5 | endoplasmic<br>reticulum | 094457, 01366<br>6 |
| <a href="#">PLSP324</a> | 4896_fungi | Steroid metabolism ; ergosterol<br>biosynthesis ; ergosterol from zymosterol                                          | step 5/5 | membrane                 | P36209             |
| <a href="#">PLSP332</a> | 4896_fungi | Terpene metabolism ; lanosterol<br>biosynthesis ; lanosterol from farnesyl-<br>PP                                     | step 1/3 | endoplasmic<br>reticulum | P36596             |
| <a href="#">PLSP332</a> | 4896_fungi | Terpene metabolism ; lanosterol<br>biosynthesis ; lanosterol from farnesyl-<br>PP                                     | step 2/3 | endoplasmic<br>reticulum | Q9C1W3             |
| <a href="#">PLSP332</a> | 4896_fungi | Terpene metabolism ; lanosterol<br>biosynthesis ; lanosterol from farnesyl-<br>PP                                     | step 2/3 | microsome                | Q9C1W3             |
| <a href="#">PLSP116</a> | 4924_fungi | Cofactor biosynthesis ; NAD(+)<br>biosynthesis ; pyridine-2,3-dicarboxylate<br>from L-kynurenine                      | step 1/3 | mitochondria             | A3LNF8             |
| <a href="#">PLSP116</a> | 4924_fungi | Cofactor biosynthesis ; NAD(+)<br>biosynthesis ; pyridine-2,3-dicarboxylate<br>from L-kynurenine                      | step 2/3 | cytoplasm                | A3LQD7             |
| <a href="#">PLSP116</a> | 4924_fungi | Cofactor biosynthesis ; NAD(+)<br>biosynthesis ; pyridine-2,3-dicarboxylate<br>from L-kynurenine                      | step 3/3 | cytoplasm                | A3LP72             |
| <a href="#">PLSP30</a>  | 4932_fungi | Amino-acid biosynthesis ; L-leucine<br>biosynthesis ; L-leucine from 3-methyl-2-<br>oxobutanoate                      | step 1/4 | cytoplasm                | P06208             |

|                         |            |                                                                                                            |          |                       |                        |
|-------------------------|------------|------------------------------------------------------------------------------------------------------------|----------|-----------------------|------------------------|
| <a href="#">PLSP30</a>  | 4932_fungi | Amino-acid biosynthesis ; L-leucine biosynthesis ; L-leucine from 3-methyl-2-oxobutanoate                  | step 1/4 | mitochondria          | P06208, Q12166         |
| <a href="#">PLSP30</a>  | 4932_fungi | Amino-acid biosynthesis ; L-leucine biosynthesis ; L-leucine from 3-methyl-2-oxobutanoate                  | step 3/4 | cytoplasm             | P04173                 |
| <a href="#">PLSP31</a>  | 4932_fungi | Amino-acid biosynthesis ; L-lysine biosynthesis via AAA pathway ; L-alpha-aminoadipate from 2-oxoglutarate | step 1/4 | cytoplasm             | P48570                 |
| <a href="#">PLSP31</a>  | 4932_fungi | Amino-acid biosynthesis ; L-lysine biosynthesis via AAA pathway ; L-alpha-aminoadipate from 2-oxoglutarate | step 1/4 | mitochondria          | Q12122                 |
| <a href="#">PLSP31</a>  | 4932_fungi | Amino-acid biosynthesis ; L-lysine biosynthesis via AAA pathway ; L-alpha-aminoadipate from 2-oxoglutarate | step 2/4 | mitochondria          | P49367                 |
| <a href="#">PLSP31</a>  | 4932_fungi | Amino-acid biosynthesis ; L-lysine biosynthesis via AAA pathway ; L-alpha-aminoadipate from 2-oxoglutarate | step 3/4 | mitochondria          | P40495                 |
| <a href="#">PLSP85</a>  | 4932_fungi | Carbohydrate degradation ; glycolysis ; pyruvate from D-glyceraldehyde 3-phosphate                         | step 1/5 | cytoplasm             | P00360, P00358, P00359 |
| <a href="#">PLSP85</a>  | 4932_fungi | Carbohydrate degradation ; glycolysis ; pyruvate from D-glyceraldehyde 3-phosphate                         | step 2/5 | cytoplasm             | P00560                 |
| <a href="#">PLSP85</a>  | 4932_fungi | Carbohydrate degradation ; glycolysis ; pyruvate from D-glyceraldehyde 3-phosphate                         | step 3/5 | cytoplasm             | Q12040, Q12008         |
| <a href="#">PLSP85</a>  | 4932_fungi | Carbohydrate degradation ; glycolysis ; pyruvate from D-glyceraldehyde 3-phosphate                         | step 3/5 | nucleus               | Q12040                 |
| <a href="#">PLSP85</a>  | 4932_fungi | Carbohydrate degradation ; glycolysis ; pyruvate from D-glyceraldehyde 3-phosphate                         | step 4/5 | cytoplasm             | P00924, P00925         |
| <a href="#">PLSP210</a> | 4932_fungi | Metabolic intermediate biosynthesis ; mevalonic acid biosynthesis ; (R)-mevalonic acid from acetyl-CoA     | step 1/3 | cytoplasm             | P41338                 |
| <a href="#">PLSP210</a> | 4932_fungi | Metabolic intermediate biosynthesis ; mevalonic acid biosynthesis ; (R)-mevalonic acid from acetyl-CoA     | step 3/3 | endoplasmic reticulum | P12683, P12684         |
| <a href="#">PLSP260</a> | 4932_fungi | Polyol metabolism ; myo-inositol biosynthesis ; myo-inositol from D-glucose 6-phosphate                    | step 1/2 | cytoplasm             | P11986                 |
| <a href="#">PLSP260</a> | 4932_fungi | Polyol metabolism ; myo-inositol biosynthesis ; myo-inositol from D-glucose 6-phosphate                    | step 2/2 | cytoplasm             | P38710                 |
| <a href="#">PLSP260</a> | 4932_fungi | Polyol metabolism ; myo-inositol biosynthesis ; myo-inositol from D-glucose 6-phosphate                    | step 2/2 | nucleus               | P38710                 |
| <a href="#">PLSP318</a> | 4932_fungi | Steroid biosynthesis ; zymosterol biosynthesis ; zymosterol from lanosterol                                | step 1/6 | membrane              | P10614                 |
| <a href="#">PLSP318</a> | 4932_fungi | Steroid biosynthesis ; zymosterol biosynthesis ; zymosterol from lanosterol                                | step 2/6 | membrane              | P32462                 |
| <a href="#">PLSP318</a> | 4932_fungi | Steroid biosynthesis ; zymosterol biosynthesis ; zymosterol from lanosterol                                | step 3/6 | endoplasmic reticulum | P53045                 |
| <a href="#">PLSP318</a> | 4932_fungi | Steroid biosynthesis ; zymosterol biosynthesis ; zymosterol from lanosterol                                | step 4/6 | endoplasmic reticulum | P53199                 |
| <a href="#">PLSP318</a> | 4932_fungi | Steroid biosynthesis ; zymosterol biosynthesis ; zymosterol from lanosterol                                | step 5/6 | endoplasmic reticulum | Q12452                 |
| <a href="#">PLSP324</a> | 4932_fungi | Steroid metabolism ; ergosterol biosynthesis ; ergosterol from zymosterol                                  | step 2/5 | endoplasmic reticulum | P32352                 |
| <a href="#">PLSP324</a> | 4932_fungi | Steroid metabolism ; ergosterol biosynthesis ; ergosterol from zymosterol                                  | step 3/5 | endoplasmic reticulum | P32353                 |
| <a href="#">PLSP324</a> | 4932_fungi | Steroid metabolism ; ergosterol biosynthesis ; ergosterol from zymosterol                                  | step 5/5 | membrane              | P25340                 |

|                         |            |                                                                                            |          |                       |                |
|-------------------------|------------|--------------------------------------------------------------------------------------------|----------|-----------------------|----------------|
| <a href="#">PLSP332</a> | 4932_fungi | Terpene metabolism ; lanosterol biosynthesis ; lanosterol from farnesyl-PP                 | step 1/3 | endoplasmic reticulum | P29704         |
| <a href="#">PLSP332</a> | 4932_fungi | Terpene metabolism ; lanosterol biosynthesis ; lanosterol from farnesyl-PP                 | step 2/3 | endoplasmic reticulum | P32476         |
| <a href="#">PLSP332</a> | 4932_fungi | Terpene metabolism ; lanosterol biosynthesis ; lanosterol from farnesyl-PP                 | step 2/3 | microsome             | P32476         |
| <a href="#">PLSP332</a> | 4932_fungi | Terpene metabolism ; lanosterol biosynthesis ; lanosterol from farnesyl-PP                 | step 3/3 | endoplasmic reticulum | P38604         |
| <a href="#">PLSP116</a> | 4952_fungi | Cofactor biosynthesis ; NAD(+) biosynthesis ; pyridine-2,3-dicarboxylate from L-kynurenine | step 1/3 | mitochondria          | Q6C9M8         |
| <a href="#">PLSP116</a> | 4952_fungi | Cofactor biosynthesis ; NAD(+) biosynthesis ; pyridine-2,3-dicarboxylate from L-kynurenine | step 2/3 | cytoplasm             | Q6CDM0         |
| <a href="#">PLSP116</a> | 4952_fungi | Cofactor biosynthesis ; NAD(+) biosynthesis ; pyridine-2,3-dicarboxylate from L-kynurenine | step 3/3 | cytoplasm             | Q6CFX1         |
| <a href="#">PLSP116</a> | 4959_fungi | Cofactor biosynthesis ; NAD(+) biosynthesis ; pyridine-2,3-dicarboxylate from L-kynurenine | step 1/3 | mitochondria          | Q6BV21         |
| <a href="#">PLSP116</a> | 4959_fungi | Cofactor biosynthesis ; NAD(+) biosynthesis ; pyridine-2,3-dicarboxylate from L-kynurenine | step 2/3 | cytoplasm             | Q6BI19         |
| <a href="#">PLSP116</a> | 5057_fungi | Cofactor biosynthesis ; NAD(+) biosynthesis ; pyridine-2,3-dicarboxylate from L-kynurenine | step 1/3 | mitochondria          | A1CT23         |
| <a href="#">PLSP116</a> | 5057_fungi | Cofactor biosynthesis ; NAD(+) biosynthesis ; pyridine-2,3-dicarboxylate from L-kynurenine | step 2/3 | cytoplasm             | A1C688, A1C870 |
| <a href="#">PLSP116</a> | 5057_fungi | Cofactor biosynthesis ; NAD(+) biosynthesis ; pyridine-2,3-dicarboxylate from L-kynurenine | step 3/3 | cytoplasm             | A1C408, A1C874 |
| <a href="#">PLSP116</a> | 5062_fungi | Cofactor biosynthesis ; NAD(+) biosynthesis ; pyridine-2,3-dicarboxylate from L-kynurenine | step 1/3 | mitochondria          | Q2UPP1         |
| <a href="#">PLSP116</a> | 5062_fungi | Cofactor biosynthesis ; NAD(+) biosynthesis ; pyridine-2,3-dicarboxylate from L-kynurenine | step 2/3 | cytoplasm             | Q2U038, Q2UJE8 |
| <a href="#">PLSP116</a> | 5062_fungi | Cofactor biosynthesis ; NAD(+) biosynthesis ; pyridine-2,3-dicarboxylate from L-kynurenine | step 3/3 | cytoplasm             | Q2UHT9, Q2UB88 |
| <a href="#">PLSP116</a> | 5085_fungi | Cofactor biosynthesis ; NAD(+) biosynthesis ; pyridine-2,3-dicarboxylate from L-kynurenine | step 1/3 | mitochondria          | Q4WN75         |
| <a href="#">PLSP116</a> | 5085_fungi | Cofactor biosynthesis ; NAD(+) biosynthesis ; pyridine-2,3-dicarboxylate from L-kynurenine | step 2/3 | cytoplasm             | Q4X1D4, Q4WPN0 |
| <a href="#">PLSP116</a> | 5085_fungi | Cofactor biosynthesis ; NAD(+) biosynthesis ; pyridine-2,3-dicarboxylate from L-kynurenine | step 3/3 | cytoplasm             | Q4WCF1, Q4WZC3 |
| <a href="#">PLSP116</a> | 5141_fungi | Cofactor biosynthesis ; NAD(+) biosynthesis ; pyridine-2,3-dicarboxylate from L-kynurenine | step 1/3 | mitochondria          | Q7S3C9         |
| <a href="#">PLSP116</a> | 5141_fungi | Cofactor biosynthesis ; NAD(+) biosynthesis ; pyridine-2,3-dicarboxylate from L-kynurenine | step 2/3 | cytoplasm             | Q7RXY2, Q7S332 |
| <a href="#">PLSP116</a> | 5141_fungi | Cofactor biosynthesis ; NAD(+) biosynthesis ; pyridine-2,3-dicarboxylate from L-kynurenine | step 3/3 | cytoplasm             | Q7SDX3         |



|                         |                    |                                                                                            |          |                       |        |
|-------------------------|--------------------|--------------------------------------------------------------------------------------------|----------|-----------------------|--------|
| <a href="#">PLSP116</a> | 5207_fungi         | Cofactor biosynthesis ; NAD(+) biosynthesis ; pyridine-2,3-dicarboxylate from L-kynurenine | step 1/3 | mitochondria          | Q55W30 |
| <a href="#">PLSP116</a> | 5207_fungi         | Cofactor biosynthesis ; NAD(+) biosynthesis ; pyridine-2,3-dicarboxylate from L-kynurenine | step 2/3 | cytoplasm             | Q5KK77 |
| <a href="#">PLSP116</a> | 5207_fungi         | Cofactor biosynthesis ; NAD(+) biosynthesis ; pyridine-2,3-dicarboxylate from L-kynurenine | step 3/3 | cytoplasm             | Q5KLD9 |
| <a href="#">PLSP116</a> | 5270_fungi         | Cofactor biosynthesis ; NAD(+) biosynthesis ; pyridine-2,3-dicarboxylate from L-kynurenine | step 1/3 | mitochondria          | Q4P0N0 |
| <a href="#">PLSP116</a> | 5270_fungi         | Cofactor biosynthesis ; NAD(+) biosynthesis ; pyridine-2,3-dicarboxylate from L-kynurenine | step 3/3 | cytoplasm             | Q4P2Q7 |
| <a href="#">PLSP116</a> | 5476_fungi         | Cofactor biosynthesis ; NAD(+) biosynthesis ; pyridine-2,3-dicarboxylate from L-kynurenine | step 1/3 | mitochondria          | Q5A7M3 |
| <a href="#">PLSP116</a> | 5476_fungi         | Cofactor biosynthesis ; NAD(+) biosynthesis ; pyridine-2,3-dicarboxylate from L-kynurenine | step 2/3 | cytoplasm             | Q59QC4 |
| <a href="#">PLSP116</a> | 5476_fungi         | Cofactor biosynthesis ; NAD(+) biosynthesis ; pyridine-2,3-dicarboxylate from L-kynurenine | step 3/3 | cytoplasm             | Q59K86 |
| <a href="#">PLSP318</a> | 5476_fungi         | Steroid biosynthesis ; zymosterol biosynthesis ; zymosterol from lanosterol                | step 1/6 | membrane              | P10613 |
| <a href="#">PLSP318</a> | 5476_fungi         | Steroid biosynthesis ; zymosterol biosynthesis ; zymosterol from lanosterol                | step 3/6 | endoplasmic reticulum | 059933 |
| <a href="#">PLSP332</a> | 5476_fungi         | Terpene metabolism ; lanosterol biosynthesis ; lanosterol from farnesyl-PP                 | step 1/3 | endoplasmic reticulum | P78589 |
| <a href="#">PLSP332</a> | 5476_fungi         | Terpene metabolism ; lanosterol biosynthesis ; lanosterol from farnesyl-PP                 | step 2/3 | endoplasmic reticulum | Q92206 |
| <a href="#">PLSP332</a> | 5476_fungi         | Terpene metabolism ; lanosterol biosynthesis ; lanosterol from farnesyl-PP                 | step 2/3 | microsome             | Q92206 |
| <a href="#">PLSP332</a> | 5478_fungi         | Terpene metabolism ; lanosterol biosynthesis ; lanosterol from farnesyl-PP                 | step 1/3 | endoplasmic reticulum | Q9HGZ6 |
| <a href="#">PLSP332</a> | 5478_fungi         | Terpene metabolism ; lanosterol biosynthesis ; lanosterol from farnesyl-PP                 | step 2/3 | endoplasmic reticulum | 013306 |
| <a href="#">PLSP332</a> | 5478_fungi         | Terpene metabolism ; lanosterol biosynthesis ; lanosterol from farnesyl-PP                 | step 2/3 | microsome             | 013306 |
| <a href="#">PLSP116</a> | 6238_invertebrates | Cofactor biosynthesis ; NAD(+) biosynthesis ; pyridine-2,3-dicarboxylate from L-kynurenine | step 1/3 | mitochondria          | A8Y432 |
| <a href="#">PLSP116</a> | 6238_invertebrates | Cofactor biosynthesis ; NAD(+) biosynthesis ; pyridine-2,3-dicarboxylate from L-kynurenine | step 2/3 | cytoplasm             | A8XKT0 |
| <a href="#">PLSP116</a> | 6238_invertebrates | Cofactor biosynthesis ; NAD(+) biosynthesis ; pyridine-2,3-dicarboxylate from L-kynurenine | step 3/3 | cytoplasm             | Q60W34 |
| <a href="#">PLSP116</a> | 6239_invertebrates | Cofactor biosynthesis ; NAD(+) biosynthesis ; pyridine-2,3-dicarboxylate from L-kynurenine | step 1/3 | mitochondria          | Q21795 |
| <a href="#">PLSP116</a> | 6239_invertebrates | Cofactor biosynthesis ; NAD(+) biosynthesis ; pyridine-2,3-dicarboxylate from L-kynurenine | step 2/3 | cytoplasm             | Q18026 |
| <a href="#">PLSP116</a> | 6239_invertebrates | Cofactor biosynthesis ; NAD(+) biosynthesis ; pyridine-2,3-dicarboxylate from L-kynurenine | step 3/3 | cytoplasm             | Q19341 |

|                         |                    |                                                                                                             |          |                       |                        |
|-------------------------|--------------------|-------------------------------------------------------------------------------------------------------------|----------|-----------------------|------------------------|
| <a href="#">PLSP231</a> | 6239_invertebrates | Phospholipid metabolism ; CDP-diacylglycerol biosynthesis ; CDP-diacylglycerol from sn-glycerol 3-phosphate | step 1/3 | mitochondria          | Q22949                 |
| <a href="#">PLSP231</a> | 6239_invertebrates | Phospholipid metabolism ; CDP-diacylglycerol biosynthesis ; CDP-diacylglycerol from sn-glycerol 3-phosphate | step 2/3 | membrane              | Q11087, Q93841, Q22267 |
| <a href="#">PLSP231</a> | 6239_invertebrates | Phospholipid metabolism ; CDP-diacylglycerol biosynthesis ; CDP-diacylglycerol from sn-glycerol 3-phosphate | step 3/3 | membrane              | P53439                 |
| <a href="#">PLSP260</a> | 7227_invertebrates | Polyol metabolism ; myo-inositol biosynthesis ; myo-inositol from D-glucose 6-phosphate                     | step 1/2 | cytoplasm             | O97477                 |
| <a href="#">PLSP260</a> | 7227_invertebrates | Polyol metabolism ; myo-inositol biosynthesis ; myo-inositol from D-glucose 6-phosphate                     | step 2/2 | membrane              | Q9VYF2                 |
| <a href="#">PLSP303</a> | 7227_invertebrates | Pyrimidine metabolism ; UMP biosynthesis via de novo pathway ; UMP from HCO(3) (-)                          | step 1/6 | cytoplasm             | P05990                 |
| <a href="#">PLSP303</a> | 7227_invertebrates | Pyrimidine metabolism ; UMP biosynthesis via de novo pathway ; UMP from HCO(3) (-)                          | step 2/6 | cytoplasm             | P05990                 |
| <a href="#">PLSP303</a> | 7227_invertebrates | Pyrimidine metabolism ; UMP biosynthesis via de novo pathway ; UMP from HCO(3) (-)                          | step 3/6 | cytoplasm             | P05990                 |
| <a href="#">PLSP303</a> | 7227_invertebrates | Pyrimidine metabolism ; UMP biosynthesis via de novo pathway ; UMP from HCO(3) (-)                          | step 4/6 | mitochondria          | P32748                 |
| <a href="#">PLSP116</a> | 7955 Vertebrates   | Cofactor biosynthesis ; NAD(+) biosynthesis ; pyridine-2,3-dicarboxylate from L-kynurenine                  | step 1/3 | mitochondria          | Q1RLY6                 |
| <a href="#">PLSP116</a> | 7955 Vertebrates   | Cofactor biosynthesis ; NAD(+) biosynthesis ; pyridine-2,3-dicarboxylate from L-kynurenine                  | step 3/3 | cytoplasm             | Q5U3F8                 |
| <a href="#">PLSP260</a> | 8355 Vertebrates   | Polyol metabolism ; myo-inositol biosynthesis ; myo-inositol from D-glucose 6-phosphate                     | step 1/2 | cytoplasm             | Q7ZXY0, Q6DDT1         |
| <a href="#">PLSP260</a> | 8355 Vertebrates   | Polyol metabolism ; myo-inositol biosynthesis ; myo-inositol from D-glucose 6-phosphate                     | step 2/2 | cytoplasm             | P29219                 |
| <a href="#">PLSP260</a> | 8355 Vertebrates   | Polyol metabolism ; myo-inositol biosynthesis ; myo-inositol from D-glucose 6-phosphate                     | step 2/2 | membrane              | Q6NTW5                 |
| <a href="#">PLSP116</a> | 8364 Vertebrates   | Cofactor biosynthesis ; NAD(+) biosynthesis ; pyridine-2,3-dicarboxylate from L-kynurenine                  | step 1/3 | mitochondria          | Q6DIZ8                 |
| <a href="#">PLSP116</a> | 8364 Vertebrates   | Cofactor biosynthesis ; NAD(+) biosynthesis ; pyridine-2,3-dicarboxylate from L-kynurenine                  | step 3/3 | cytoplasm             | Q6DIZ0                 |
| <a href="#">PLSP23</a>  | 9541 Mammals       | Amino-acid biosynthesis ; L-cysteine biosynthesis ; L-cysteine from L-homocysteine and L-serine             | step 1/2 | cytoplasm             | Q58H57                 |
| <a href="#">PLSP23</a>  | 9541 Mammals       | Amino-acid biosynthesis ; L-cysteine biosynthesis ; L-cysteine from L-homocysteine and L-serine             | step 1/2 | nucleus               | Q58H57                 |
| <a href="#">PLSP23</a>  | 9541 Mammals       | Amino-acid biosynthesis ; L-cysteine biosynthesis ; L-cysteine from L-homocysteine and L-serine             | step 2/2 | cytoplasm             | Q60HG7                 |
| <a href="#">PLSP318</a> | 9601 Mammals       | Steroid biosynthesis ; zymosterol biosynthesis ; zymosterol from lanosterol                                 | step 1/6 | endoplasmic reticulum | Q5RE72                 |
| <a href="#">PLSP318</a> | 9601 Mammals       | Steroid biosynthesis ; zymosterol biosynthesis ; zymosterol from lanosterol                                 | step 1/6 | microsome             | Q5RE72                 |
| <a href="#">PLSP318</a> | 9601 Mammals       | Steroid biosynthesis ; zymosterol biosynthesis ; zymosterol from lanosterol                                 | step 3/6 | endoplasmic reticulum | Q5R574                 |
| <a href="#">PLSP14</a>  | 9606 Human         | Amine and polyamine degradation ; betaine degradation ; sarcosine from betaine                              | step 1/2 | cytoplasm             | Q93088                 |

|                         |            |                                                                                                                           |          |                       |                                |
|-------------------------|------------|---------------------------------------------------------------------------------------------------------------------------|----------|-----------------------|--------------------------------|
| <a href="#">PLSP14</a>  | 9606_human | Amine and polyamine degradation ; betaine degradation ; sarcosine from betaine                                            | step 2/2 | mitochondria          | Q9UI17                         |
| <a href="#">PLSP23</a>  | 9606_human | Amino-acid biosynthesis ; L-cysteine biosynthesis ; L-cysteine from L-homocysteine and L-serine                           | step 1/2 | cytoplasm             | P35520                         |
| <a href="#">PLSP23</a>  | 9606_human | Amino-acid biosynthesis ; L-cysteine biosynthesis ; L-cysteine from L-homocysteine and L-serine                           | step 1/2 | nucleus               | P35520                         |
| <a href="#">PLSP23</a>  | 9606_human | Amino-acid biosynthesis ; L-cysteine biosynthesis ; L-cysteine from L-homocysteine and L-serine                           | step 2/2 | cytoplasm             | P32929                         |
| <a href="#">PLSP116</a> | 9606_human | Cofactor biosynthesis ; NAD(+) biosynthesis ; pyridine-2,3-dicarboxylate from L-kynurenine                                | step 1/3 | mitochondria          | 015229                         |
| <a href="#">PLSP116</a> | 9606_human | Cofactor biosynthesis ; NAD(+) biosynthesis ; pyridine-2,3-dicarboxylate from L-kynurenine                                | step 2/3 | cytoplasm             | Q16719                         |
| <a href="#">PLSP116</a> | 9606_human | Cofactor biosynthesis ; NAD(+) biosynthesis ; pyridine-2,3-dicarboxylate from L-kynurenine                                | step 3/3 | cytoplasm             | P46952                         |
| <a href="#">PLSP121</a> | 9606_human | Cofactor biosynthesis ; coenzyme A biosynthesis ; coenzyme A from pantothenate                                            | step 1/5 | cytoplasm             | Q9BZ23, Q8TE04, Q9H999, Q9NVE7 |
| <a href="#">PLSP121</a> | 9606_human | Cofactor biosynthesis ; coenzyme A biosynthesis ; coenzyme A from pantothenate                                            | step 1/5 | mitochondria          | Q9BZ23                         |
| <a href="#">PLSP121</a> | 9606_human | Cofactor biosynthesis ; coenzyme A biosynthesis ; coenzyme A from pantothenate                                            | step 4/5 | cytoplasm             | Q13057                         |
| <a href="#">PLSP121</a> | 9606_human | Cofactor biosynthesis ; coenzyme A biosynthesis ; coenzyme A from pantothenate                                            | step 5/5 | cytoplasm             | Q13057                         |
| <a href="#">PLSP181</a> | 9606_human | Isoprenoid biosynthesis ; isopentenyl-PP biosynthesis via mevalonic acid pathway ; isopentenyl-PP from (R)-mevalonic acid | step 1/3 | cytoplasm             | Q03426                         |
| <a href="#">PLSP181</a> | 9606_human | Isoprenoid biosynthesis ; isopentenyl-PP biosynthesis via mevalonic acid pathway ; isopentenyl-PP from (R)-mevalonic acid | step 1/3 | peroxisome            | Q03426                         |
| <a href="#">PLSP181</a> | 9606_human | Isoprenoid biosynthesis ; isopentenyl-PP biosynthesis via mevalonic acid pathway ; isopentenyl-PP from (R)-mevalonic acid | step 2/3 | peroxisome            | Q15126                         |
| <a href="#">PLSP231</a> | 9606_human | Phospholipid metabolism ; CDP-diacylglycerol biosynthesis ; CDP-diacylglycerol from sn-glycerol 3-phosphate               | step 1/3 | mitochondria          | Q9HCL2                         |
| <a href="#">PLSP231</a> | 9606_human | Phospholipid metabolism ; CDP-diacylglycerol biosynthesis ; CDP-diacylglycerol from sn-glycerol 3-phosphate               | step 2/3 | endoplasmic reticulum | Q6UWP7, Q643R3, Q53EU6         |
| <a href="#">PLSP231</a> | 9606_human | Phospholipid metabolism ; CDP-diacylglycerol biosynthesis ; CDP-diacylglycerol from sn-glycerol 3-phosphate               | step 3/3 | cytoplasm             | Q92903                         |
| <a href="#">PLSP231</a> | 9606_human | Phospholipid metabolism ; CDP-diacylglycerol biosynthesis ; CDP-diacylglycerol from sn-glycerol 3-phosphate               | step 3/3 | endoplasmic reticulum | Q92903                         |
| <a href="#">PLSP231</a> | 9606_human | Phospholipid metabolism ; CDP-diacylglycerol biosynthesis ; CDP-diacylglycerol from sn-glycerol 3-phosphate               | step 3/3 | mitochondria          | 095674                         |
| <a href="#">PLSP260</a> | 9606_human | Polyol metabolism ; myo-inositol biosynthesis ; myo-inositol from D-glucose 6-phosphate                                   | step 1/2 | cytoplasm             | Q9NPH2                         |

|                         |              |                                                                                                                           |          |                       |                |
|-------------------------|--------------|---------------------------------------------------------------------------------------------------------------------------|----------|-----------------------|----------------|
| <a href="#">PLSP260</a> | 9606_human   | Polyol metabolism ; myo-inositol biosynthesis ; myo-inositol from D-glucose 6-phosphate                                   | step 2/2 | cytoplasm             | P29218         |
| <a href="#">PLSP260</a> | 9606_human   | Polyol metabolism ; myo-inositol biosynthesis ; myo-inositol from D-glucose 6-phosphate                                   | step 2/2 | membrane              | Q9NX62         |
| <a href="#">PLSP303</a> | 9606_human   | Pyrimidine metabolism ; UMP biosynthesis via de novo pathway ; UMP from HCO(3) (-)                                        | step 1/6 | cytoplasm             | P27708         |
| <a href="#">PLSP303</a> | 9606_human   | Pyrimidine metabolism ; UMP biosynthesis via de novo pathway ; UMP from HCO(3) (-)                                        | step 2/6 | cytoplasm             | P27708         |
| <a href="#">PLSP303</a> | 9606_human   | Pyrimidine metabolism ; UMP biosynthesis via de novo pathway ; UMP from HCO(3) (-)                                        | step 3/6 | cytoplasm             | P27708         |
| <a href="#">PLSP303</a> | 9606_human   | Pyrimidine metabolism ; UMP biosynthesis via de novo pathway ; UMP from HCO(3) (-)                                        | step 4/6 | mitochondria          | Q02127         |
| <a href="#">PLSP318</a> | 9606_human   | Steroid biosynthesis ; zymosterol biosynthesis ; zymosterol from lanosterol                                               | step 1/6 | endoplasmic reticulum | Q16850         |
| <a href="#">PLSP318</a> | 9606_human   | Steroid biosynthesis ; zymosterol biosynthesis ; zymosterol from lanosterol                                               | step 1/6 | microsome             | Q16850         |
| <a href="#">PLSP318</a> | 9606_human   | Steroid biosynthesis ; zymosterol biosynthesis ; zymosterol from lanosterol                                               | step 3/6 | endoplasmic reticulum | Q15800         |
| <a href="#">PLSP318</a> | 9606_human   | Steroid biosynthesis ; zymosterol biosynthesis ; zymosterol from lanosterol                                               | step 4/6 | membrane              | Q15738         |
| <a href="#">PLSP318</a> | 9606_human   | Steroid biosynthesis ; zymosterol biosynthesis ; zymosterol from lanosterol                                               | step 5/6 | cell membrane         | P56937         |
| <a href="#">PLSP332</a> | 9606_human   | Terpene metabolism ; lanosterol biosynthesis ; lanosterol from farnesyl-PP                                                | step 1/3 | endoplasmic reticulum | P37268         |
| <a href="#">PLSP332</a> | 9606_human   | Terpene metabolism ; lanosterol biosynthesis ; lanosterol from farnesyl-PP                                                | step 2/3 | endoplasmic reticulum | Q14534         |
| <a href="#">PLSP332</a> | 9606_human   | Terpene metabolism ; lanosterol biosynthesis ; lanosterol from farnesyl-PP                                                | step 2/3 | microsome             | Q14534         |
| <a href="#">PLSP85</a>  | 9823_mammals | Carbohydrate degradation ; glycolysis ; pyruvate from D-glyceraldehyde 3-phosphate                                        | step 1/5 | cytoplasm             | P00355         |
| <a href="#">PLSP85</a>  | 9823_mammals | Carbohydrate degradation ; glycolysis ; pyruvate from D-glyceraldehyde 3-phosphate                                        | step 2/5 | cytoplasm             | Q7SIB7, Q6R185 |
| <a href="#">PLSP85</a>  | 9823_mammals | Carbohydrate degradation ; glycolysis ; pyruvate from D-glyceraldehyde 3-phosphate                                        | step 4/5 | cytoplasm             | Q1KYT0         |
| <a href="#">PLSP85</a>  | 9823_mammals | Carbohydrate degradation ; glycolysis ; pyruvate from D-glyceraldehyde 3-phosphate                                        | step 4/5 | myofibril             | Q1KYT0         |
| <a href="#">PLSP318</a> | 9823_mammals | Steroid biosynthesis ; zymosterol biosynthesis ; zymosterol from lanosterol                                               | step 1/6 | endoplasmic reticulum | 046420         |
| <a href="#">PLSP318</a> | 9823_mammals | Steroid biosynthesis ; zymosterol biosynthesis ; zymosterol from lanosterol                                               | step 1/6 | microsome             | 046420         |
| <a href="#">PLSP318</a> | 9823_mammals | Steroid biosynthesis ; zymosterol biosynthesis ; zymosterol from lanosterol                                               | step 3/6 | endoplasmic reticulum | Q6UGB2         |
| <a href="#">PLSP181</a> | 9913_mammals | Isoprenoid biosynthesis ; isopentenyl-PP biosynthesis via mevalonic acid pathway ; isopentenyl-PP from (R)-mevalonic acid | step 1/3 | cytoplasm             | Q5E9T8         |
| <a href="#">PLSP181</a> | 9913_mammals | Isoprenoid biosynthesis ; isopentenyl-PP biosynthesis via mevalonic acid pathway ; isopentenyl-PP from (R)-mevalonic acid | step 1/3 | peroxisome            | Q5E9T8         |
| <a href="#">PLSP181</a> | 9913_mammals | Isoprenoid biosynthesis ; isopentenyl-PP biosynthesis via mevalonic acid pathway ; isopentenyl-PP from (R)-mevalonic acid | step 2/3 | peroxisome            | Q2KIU2         |
| <a href="#">PLSP231</a> | 9913_mammals | Phospholipid metabolism ; CDP-diacylglycerol biosynthesis ; CDP-diacylglycerol from sn-glycerol 3-phosphate               | step 1/3 | mitochondria          | Q5GJ77         |

|                         |              |                                                                                                             |          |              |                        |
|-------------------------|--------------|-------------------------------------------------------------------------------------------------------------|----------|--------------|------------------------|
| <a href="#">PLSP231</a> | 9913_mammals | Phospholipid metabolism ; CDP-diacylglycerol biosynthesis ; CDP-diacylglycerol from sn-glycerol 3-phosphate | step 2/3 | membrane     | Q95JH2, Q5E9R2, A3FPG8 |
| <a href="#">PLSP231</a> | 9913_mammals | Phospholipid metabolism ; CDP-diacylglycerol biosynthesis ; CDP-diacylglycerol from sn-glycerol 3-phosphate | step 3/3 | mitochondria | A0JNC1                 |
| <a href="#">PLSP260</a> | 9913_mammals | Polyol metabolism ; myo-inositol biosynthesis ; myo-inositol from D-glucose 6-phosphate                     | step 1/2 | cytoplasm    | Q2NL29                 |
| <a href="#">PLSP260</a> | 9913_mammals | Polyol metabolism ; myo-inositol biosynthesis ; myo-inositol from D-glucose 6-phosphate                     | step 2/2 | cytoplasm    | P20456                 |
| <a href="#">PLSP260</a> | 9913_mammals | Polyol metabolism ; myo-inositol biosynthesis ; myo-inositol from D-glucose 6-phosphate                     | step 2/2 | membrane     | Q2KJ53                 |
| <a href="#">PLSP85</a>  | 9986_mammals | Carbohydrate degradation ; glycolysis ; pyruvate from D-glyceraldehyde 3-phosphate                          | step 1/5 | cytoplasm    | P46406                 |
| <a href="#">PLSP85</a>  | 9986_mammals | Carbohydrate degradation ; glycolysis ; pyruvate from D-glyceraldehyde 3-phosphate                          | step 4/5 | cytoplasm    | P25704                 |
| <a href="#">PLSP85</a>  | 9986_mammals | Carbohydrate degradation ; glycolysis ; pyruvate from D-glyceraldehyde 3-phosphate                          | step 4/5 | myofibril    | P25704                 |
