# Supplementary material for: PathLocdb: a comprehensive database for the subcellular localization of metabolic pathways and its application to multiple localization analysis
Source: PubMed Central journal article supplement (PMC3005916; doi:10.1186/1471-2164-11-s4-s13), 2010-12-02
Supplement: 1471-2164-11-S4-S13-S4.pdf [file 1471-2164-11-S4-S13-S4.pdf]

| Superpathway ID         | Superpathway name                                                                                    | Location              | UniProt accession number | Mapping to the gene duplication dataset from two published paper |
|-------------------------|------------------------------------------------------------------------------------------------------|-----------------------|--------------------------|------------------------------------------------------------------|
| <a href="#">PLSP82</a>  | Carbohydrate biosynthesis; gluconeogenesis                                                           | mitochondria          | P11498                   | NM_000920                                                        |
| <a href="#">PLSP82</a>  | Carbohydrate biosynthesis; gluconeogenesis                                                           | mitochondria          | P11498                   | NM_022172                                                        |
| <a href="#">PLSP94</a>  | Carbohydrate metabolism; hexose metabolism                                                           | mitochondria          | P52789                   | NM_000189                                                        |
| <a href="#">PLSP96</a>  | Carbohydrate metabolism; tricarboxylic acid cycle                                                    | mitochondria          | O14521                   | NM_003002                                                        |
| <a href="#">PLSP96</a>  | Carbohydrate metabolism; tricarboxylic acid cycle                                                    | mitochondria          | O75390                   | NM_004077                                                        |
| <a href="#">PLSP96</a>  | Carbohydrate metabolism; tricarboxylic acid cycle                                                    | mitochondria          | P31040                   | NM_004168                                                        |
| <a href="#">PLSP166</a> | Glycan metabolism; heparan sulfate biosynthesis                                                      | endoplasmic reticulum | Q9UBQ6                   | NM_001439                                                        |
| <a href="#">PLSP166</a> | Glycan metabolism; heparan sulfate biosynthesis                                                      | extracellular         | Q9UBQ6                   | NM_001439                                                        |
| <a href="#">PLSP173</a> | Glycolipid biosynthesis; glycosylphosphatidylinositol-anchor biosynthesis                            | endoplasmic reticulum | O95427                   | NM_012327                                                        |
| <a href="#">PLSP173</a> | Glycolipid biosynthesis; glycosylphosphatidylinositol-anchor biosynthesis                            | endoplasmic reticulum | Q07326                   | NM_002643                                                        |
| <a href="#">PLSP173</a> | Glycolipid biosynthesis; glycosylphosphatidylinositol-anchor biosynthesis                            | endoplasmic reticulum | Q86VD9                   | NM_025163                                                        |
| <a href="#">PLSP173</a> | Glycolipid biosynthesis; glycosylphosphatidylinositol-anchor biosynthesis                            | endoplasmic reticulum | Q92535                   | NM_002642                                                        |
| <a href="#">PLSP187</a> | Lipid metabolism; fatty acid beta-oxidation                                                          | mitochondria          | P55084                   | NM_000183                                                        |
| <a href="#">PLSP188</a> | Lipid metabolism; fatty acid biosynthesis                                                            | endoplasmic reticulum | Q53GQ0                   | NM_016142                                                        |
| <a href="#">PLSP189</a> | Lipid metabolism; fatty acid metabolism                                                              | mitochondria          | P42765                   | NM_006111                                                        |
| <a href="#">PLSP190</a> | Lipid metabolism; glycerolipid metabolism                                                            | mitochondria          | Q53H12                   | NM_018238                                                        |
| <a href="#">PLSP194</a> | Lipid metabolism; leukotriene D4 biosynthesis                                                        | cell membrane         | P36269                   | NM_004121                                                        |
| <a href="#">PLSP194</a> | Lipid metabolism; leukotriene D4 biosynthesis                                                        | cytoplasm             | P16050                   | NM_001140                                                        |
| <a href="#">PLSP202</a> | Lipid metabolism; sphingolipid metabolism                                                            | endoplasmic reticulum | O15269                   | NM_006415                                                        |
| <a href="#">PLSP227</a> | One-carbon metabolism; tetrahydrofolate pathway                                                      | cytoplasm             | P34896                   | NM_004169                                                        |
| <a href="#">PLSP232</a> | Phospholipid metabolism ; phosphatidylcholine biosynthesis ; phosphatidylcholine from phosphocholine | cytoplasm             | P49585                   | NM_005017                                                        |
| <a href="#">PLSP283</a> | Protein modification; protein glycosylation                                                          | cytoplasm             | O15305                   | NM_000303                                                        |
| <a href="#">PLSP283</a> | Protein modification; protein glycosylation                                                          | endoplasmic reticulum | Q5BKT4                   | NM_032834                                                        |
| <a href="#">PLSP283</a> | Protein modification; protein glycosylation                                                          | endoplasmic reticulum | Q92685                   | NM_005787                                                        |
| <a href="#">PLSP283</a> | Protein modification; protein glycosylation                                                          | endoplasmic reticulum | Q9BT22                   | NM_019109                                                        |

|                         |                                              |                       |        |           |
|-------------------------|----------------------------------------------|-----------------------|--------|-----------|
| <a href="#">PLSP283</a> | Protein modification; protein glycosylation  | endoplasmic reticulum | Q9BVK2 | NM_024079 |
| <a href="#">PLSP283</a> | Protein modification; protein glycosylation  | golgi apparatus       | 094766 | NM_012200 |
| <a href="#">PLSP283</a> | Protein modification; protein glycosylation  | golgi apparatus       | P21217 | NM_000149 |
| <a href="#">PLSP283</a> | Protein modification; protein glycosylation  | golgi apparatus       | P51993 | NM_000150 |
| <a href="#">PLSP283</a> | Protein modification; protein glycosylation  | golgi apparatus       | Q11128 | NM_002034 |
| <a href="#">PLSP283</a> | Protein modification; protein glycosylation  | golgi apparatus       | Q9UJ37 | NM_006456 |
| <a href="#">PLSP286</a> | Protein modification; protein sumoylation    | cytoplasm             | P49792 | NM_006267 |
| <a href="#">PLSP286</a> | Protein modification; protein sumoylation    | nucleus               | P49792 | NM_006267 |
| <a href="#">PLSP286</a> | Protein modification; protein sumoylation    | nucleus               | Q9UBE0 | NM_005500 |
| <a href="#">PLSP287</a> | Protein modification; protein ubiquitination | cytoplasm             | P40337 | NM_000551 |
| <a href="#">PLSP287</a> | Protein modification; protein ubiquitination | cytoplasm             | Q12829 | NM_006822 |
| <a href="#">PLSP287</a> | Protein modification; protein ubiquitination | cytoplasm             | Q15034 | NM_014606 |
| <a href="#">PLSP287</a> | Protein modification; protein ubiquitination | cytoplasm             | Q16531 | NM_001923 |
| <a href="#">PLSP287</a> | Protein modification; protein ubiquitination | cytoplasm             | Q5XPI4 | NM_022064 |
| <a href="#">PLSP287</a> | Protein modification; protein ubiquitination | cytoplasm             | Q7L622 | NM_017769 |
| <a href="#">PLSP287</a> | Protein modification; protein ubiquitination | cytoplasm             | Q96PU5 | NM_015277 |
| <a href="#">PLSP287</a> | Protein modification; protein ubiquitination | cytoplasm             | Q9HAU4 | NM_022739 |
| <a href="#">PLSP287</a> | Protein modification; protein ubiquitination | cytoplasm             | Q9UBS8 | NM_004290 |
| <a href="#">PLSP287</a> | Protein modification; protein ubiquitination | cytoplasm             | Q9Y4K3 | NM_004620 |
| <a href="#">PLSP287</a> | Protein modification; protein ubiquitination | nucleus               | P40337 | NM_000551 |
| <a href="#">PLSP287</a> | Protein modification; protein ubiquitination | nucleus               | Q05086 | NM_000462 |
| <a href="#">PLSP287</a> | Protein modification; protein ubiquitination | nucleus               | Q16531 | NM_001923 |
| <a href="#">PLSP287</a> | Protein modification; protein ubiquitination | nucleus               | Q7L622 | NM_017769 |
| <a href="#">PLSP287</a> | Protein modification; protein ubiquitination | nucleus               | Q86XK2 | NM_025133 |
| <a href="#">PLSP287</a> | Protein modification; protein ubiquitination | nucleus               | Q99496 | NM_007212 |
| <a href="#">PLSP287</a> | Protein modification; protein ubiquitination | nucleus               | Q9HAU4 | NM_022739 |
| <a href="#">PLSP287</a> | Protein modification; protein ubiquitination | nucleus               | Q9UBS8 | NM_004290 |
| <a href="#">PLSP287</a> | Protein modification; protein ubiquitination | vesicle               | Q15034 | NM_014606 |
| <a href="#">PLSP321</a> | Steroid biosynthesis; estrogen biosynthesis  | cytoplasm             | P14061 | NM_000413 |
| <a href="#">PLSP321</a> | Steroid biosynthesis; estrogen biosynthesis  | endoplasmic reticulum | Q53GQ0 | NM_016142 |

The two paper are as following:

Bailey, J.A., et al., Recent segmental duplications in the human genome. *Science*, 2002. 297(5583): p. 1003-7.

Bailey, J.A., et al., Segmental duplications: organization and impact within the current human genome project assembly. *Genome Res*, 2001. 11(6): p. 1005-17.
